# Supplementary material for: Identification, cloning and characterization of R2R3-MYB gene family in canola (Brassica napus L.) identify a novel member modulating ROS accumulation and hypersensitive-like cell death
Source: PubMed Central journal article supplement — DNA Res. 2016 Jan 21;23(2):101–14. doi: 10.1093/dnares/dsv040 (PMC4833418; doi:10.1093/dnares/dsv040), 2016-01-21
Supplement: supp_dsv040_dsv040supp.pdf [file supp_dsv040_dsv040supp.pdf]

**Table S1. EST components for each BnaMYB gene identified**

| Gene name       | EST list(GB#)                                                                                                                                                                                                                                                                                                                                                                                                                                                                                             | numbers |
|-----------------|-----------------------------------------------------------------------------------------------------------------------------------------------------------------------------------------------------------------------------------------------------------------------------------------------------------------------------------------------------------------------------------------------------------------------------------------------------------------------------------------------------------|---------|
| <i>BnaMYB1</i>  | FG562006, EV105180, EV104795, EV104301, EV104487, EV217986, EV218259, EV017370, EV007116, EV171276, EV171275, GT080535, GT080173                                                                                                                                                                                                                                                                                                                                                                          | 13      |
| <i>BnaMYB2</i>  | EV108364, EV108088, EV107499, EV107802, EV107824                                                                                                                                                                                                                                                                                                                                                                                                                                                          | 5       |
| <i>BnaMYB3</i>  | EV036085, EV137123, CD829890, EV136892, ES267811, EV217210, EV217001, EE392356, EE447724, EV102195, EV176932, EV102118, EV084554, EV113081,                                                                                                                                                                                                                                                                                                                                                               | 15      |
| <i>BnaMYB4</i>  | FG579280, EE432096, FG569527, EV107955, EE554982, CD824305, FG569361, EV001261, EV107589, EV069542, EV053883, CD820923                                                                                                                                                                                                                                                                                                                                                                                    | 12      |
| <i>BnaMYB5</i>  | FG557455, FG559446, EV066471, FG573585, DY011724, EV029074, EL628966,                                                                                                                                                                                                                                                                                                                                                                                                                                     | 8       |
| <i>BnaMYB6</i>  | EE426716                                                                                                                                                                                                                                                                                                                                                                                                                                                                                                  | 1       |
| <i>BnaMYB7</i>  | CD814497, EV068015, EV054074, EV056383, EV045384, EV135986, EV135722, EE455594, EV142432, EV142168, EV015761                                                                                                                                                                                                                                                                                                                                                                                              | 11      |
| <i>BnaMYB9</i>  | EE444903, CN726972                                                                                                                                                                                                                                                                                                                                                                                                                                                                                        | 2       |
| <i>BnaMYB10</i> | EE568790                                                                                                                                                                                                                                                                                                                                                                                                                                                                                                  | 1       |
| <i>BnaMYB12</i> | EV052963, EV214117, FG559530, EV171434, EV171441, EV171478                                                                                                                                                                                                                                                                                                                                                                                                                                                | 6       |
| <i>BnaMYB13</i> | DY000543, GR446781                                                                                                                                                                                                                                                                                                                                                                                                                                                                                        | 2       |
| <i>BnaMYB15</i> | CX278128, CD834677, ES909302, CJ999528, EV227400, EV226989                                                                                                                                                                                                                                                                                                                                                                                                                                                | 6       |
| <i>BnaMYB16</i> | EE469504, EE474289, EV201981, EV186736, EV186534, EV201893                                                                                                                                                                                                                                                                                                                                                                                                                                                | 6       |
| <i>BnaMYB17</i> | EG020679, CD813379, CX187948, CD813183, EV028628, EV033184                                                                                                                                                                                                                                                                                                                                                                                                                                                | 6       |
| <i>BnaMYB18</i> | EE432793, EG020345                                                                                                                                                                                                                                                                                                                                                                                                                                                                                        | 2       |
| <i>BnaMYB21</i> | CX187597, GR441028, EV131386, EV131621, GR440457, EV225302, GR442541, GR449144, EV224973, EV133221, EV133479                                                                                                                                                                                                                                                                                                                                                                                              | 11      |
| <i>BnaMYB27</i> | ES900986,                                                                                                                                                                                                                                                                                                                                                                                                                                                                                                 | 1       |
| <i>BnaMYB28</i> | EV205917, EV019009, GT084146                                                                                                                                                                                                                                                                                                                                                                                                                                                                              | 3       |
| <i>BnaMYB30</i> | ES967084, ES985544, GH709300, CX192819, CN829495, CN829494, CN830411, CN830410, CN830379, CN830378, DY016733, FG567228, EV039358, EV033495,                                                                                                                                                                                                                                                                                                                                                               | 16      |
| <i>BnaMYB31</i> | EV052208, EV021453, EV055620, EV030145, EL627642, EE414354                                                                                                                                                                                                                                                                                                                                                                                                                                                | 6       |
| <i>BnaMYB32</i> | EE460070, FG567004, EE464782, EV163324, EV058208, CD813645, ES996448, EV169541, EV034892, CD815735, EV136510, EV136143, EV162956, EV169537, ES978442, ES903579, GR441366, EV027493, EE421958, EV022772, EV026639                                                                                                                                                                                                                                                                                          | 21      |
| <i>BnaMYB34</i> | ES902202, ES901674, ES907416, GT082302, ES913933, EV217367, EV131951, EV132263, ES902202, EE435715, EV217667                                                                                                                                                                                                                                                                                                                                                                                              | 11      |
| <i>BnaMYB37</i> | EV050408                                                                                                                                                                                                                                                                                                                                                                                                                                                                                                  | 1       |
| <i>BnaMYB38</i> | EV047434, EV043318, EE542063                                                                                                                                                                                                                                                                                                                                                                                                                                                                              | 3       |
| <i>BnaMYB41</i> | FG576099                                                                                                                                                                                                                                                                                                                                                                                                                                                                                                  | 1       |
| <i>BnaMYB43</i> | ES913743                                                                                                                                                                                                                                                                                                                                                                                                                                                                                                  | 1       |
| <i>BnaMYB44</i> | EE454244, EE408115, EE460613, DY012865, GR449006, GT083755, EE453513, GR444848, EV029474, EV146101, EV029025, ES966920, EV182779, EV164288, EV185978, EV124448, EV124281, EV124528, EV124361, EV182860, FG564972, EE436724, EV186186, CX279215, DY006419, FG556542, GT079317, EV146335, EV164606, EV226115, EE409588, EE474422, DY010719, CX279103, EE420841, ES928719, FG569627, EE478191, CD815989, FG568454, EE482310, FG570148, EV062607, EE426643, CN730439, EE482375, FG557223, EV047348, EE549228, | 50      |
| <i>BnaMYB45</i> | ES910249                                                                                                                                                                                                                                                                                                                                                                                                                                                                                                  | 1       |

|                 |                                                                                                                                                                                                                                                                                                                                                               |    |
|-----------------|---------------------------------------------------------------------------------------------------------------------------------------------------------------------------------------------------------------------------------------------------------------------------------------------------------------------------------------------------------------|----|
| <i>BnaMYB46</i> | EV127369, EV127154, FG562990                                                                                                                                                                                                                                                                                                                                  | 3  |
| <i>BnaMYB47</i> | CX281630, EE558066                                                                                                                                                                                                                                                                                                                                            | 2  |
| <i>BnaMYB48</i> | EE557265, EE557253, EV021911, EV219591, EV219351, EV218206                                                                                                                                                                                                                                                                                                    | 6  |
| <i>BnaMYB51</i> | EE441525, EV221769, EV222159, GT083698, ES900783                                                                                                                                                                                                                                                                                                              | 5  |
| <i>BnaMYB55</i> | EV053995, EV051174                                                                                                                                                                                                                                                                                                                                            | 2  |
| <i>BnaMYB56</i> | EE468140, ES994945, EV072908, EV009610, FG560099, FG575184, EV084645, CN727379, DY000266, EV025748, EV217687, EE514247, EE561644, ES994208                                                                                                                                                                                                                    | 14 |
| <i>BnaMYB57</i> | CN727183                                                                                                                                                                                                                                                                                                                                                      | 1  |
| <i>BnaMYB58</i> | ES903149, EV127893, EV127723                                                                                                                                                                                                                                                                                                                                  | 3  |
| <i>BnaMYB59</i> | CN734145, EE432821, EV041668, EE550309, ES956099, EV134091, EV133852, EV102946, ES900670, EV218708, ES982160                                                                                                                                                                                                                                                  | 11 |
| <i>BnaMYB60</i> | EV201821, CN726921, EG019425, EV201738, EG019781, FG574548                                                                                                                                                                                                                                                                                                    | 6  |
| <i>BnaMYB61</i> | EV044996, ES909631, EV122101, EV044013, EV059923, EV122017, EV044304, EV042041, EE464021, EV076842, EV073819, EV088869, EV027982, EV026308,                                                                                                                                                                                                                   | 15 |
| <i>BnaMYB62</i> | DY017568, DY017568                                                                                                                                                                                                                                                                                                                                            | 2  |
| <i>BnaMYB63</i> | EV085491, EE472135,                                                                                                                                                                                                                                                                                                                                           | 2  |
| <i>BnaMYB65</i> | CX190346, CX191895, CX193810, ES905996, EV087133                                                                                                                                                                                                                                                                                                              | 5  |
| <i>BnaMYB68</i> | ES909381, CX191605, ES909697, ES911294, EE470630, ES900275, EV070292                                                                                                                                                                                                                                                                                          | 7  |
| <i>BnaMYB70</i> | ES988352, EV126496, EV126569                                                                                                                                                                                                                                                                                                                                  | 3  |
| <i>BnaMYB71</i> | EE463219, ES912837, EL626888                                                                                                                                                                                                                                                                                                                                  | 3  |
| <i>BnaMYB73</i> | EV117185, EV118175, EV124377, EV184889, EV226584, EV117101, EV117019, DY002016, ES959932, EV016569, EV226382, EV057240, EV118093, FG576493, EL588855, EV184806, EL591252, DY002002, EV124296, EV225159, EV068002, EV224965, EV019487, EV040914, ES904772, EV047845, EL626849                                                                                  | 27 |
| <i>BnaMYB75</i> | ES976916, ES976894                                                                                                                                                                                                                                                                                                                                            | 2  |
| <i>BnaMYB77</i> | CD835413, CD814996, CD835248, FG565094, EE455241, EV041049, EE460766, EV059427, CD828382, EL587880, EL587506, EV066198, CD823048, CD831049, EV021763, GT081972, ES979958, EE562286, EV124030, EE467152, FG578598, EV123952, ES988901, ES267253, EV018619, CN732778, EV163421, EE410941, ES979621, ES979658, ES264989, EL625057, EE565075, CN727364, EV061577, | 37 |
| <i>BnaMYB78</i> | EX130477                                                                                                                                                                                                                                                                                                                                                      | 1  |
| <i>BnaMYB81</i> | CX195622, EE445112                                                                                                                                                                                                                                                                                                                                            | 2  |
| <i>BnaMYB85</i> | EV075547                                                                                                                                                                                                                                                                                                                                                      | 1  |
| <i>BnaMYB86</i> | FG555601, EV039089                                                                                                                                                                                                                                                                                                                                            | 2  |
| <i>BnaMYB88</i> | EV215661, ES904057, EV204258, EV204013                                                                                                                                                                                                                                                                                                                        | 4  |
| <i>BnaMYB90</i> | EV194857, ES976894, ES976916, EV194929                                                                                                                                                                                                                                                                                                                        | 4  |
| <i>BnaMYB91</i> | GR444849, CN736467, EV034590, EV014478, CN826196, EE441718, CB686393, EV100193, EV100123, EE515947, EE512329, EE553868, EE551924, ES963899, ES965570, ES964808, ES965020, ES965699, ES963678, ES964885, ES963886, ES963998, EE443576, ES964722, ES965468, ES965296, ES965009, ES964883, ES965836, ES964704, ES964909, ES965408, ES965676, ES965619            | 34 |
| <i>BnaMYB92</i> | ES903861                                                                                                                                                                                                                                                                                                                                                      | 1  |
| <i>BnaMYB95</i> | EE473909, ES921824, GR442066, CD841264, DY030638, EV019898, ES968873, GR440287, EV038136, EV030103, EV029563, EV026741, EE565640, EE454667, CD815189, GT084601, EE454192                                                                                                                                                                                      | 17 |

|                  |                                                                                                                                                |    |
|------------------|------------------------------------------------------------------------------------------------------------------------------------------------|----|
| <i>BnaMYB96</i>  | EV145404, EE561829, EE474153, EV014976, ES898274, EV173476, EV173463,<br>EV169763, EV169753, EG021274                                          | 10 |
| <i>BnaMYB99</i>  | EV159202, EV159072, EV159317                                                                                                                   | 3  |
| <i>BnaMYB101</i> | GR453309, EE552862                                                                                                                             | 2  |
| <i>BnaMYB102</i> | EV216621                                                                                                                                       | 1  |
| <i>BnaMYB103</i> | CX192517, FK252590, EE392431, EV128652, EV128386, FG561365                                                                                     | 6  |
| <i>BnaMYB104</i> | EE477460, EL587234                                                                                                                             | 2  |
| <i>BnaMYB105</i> | EV151423                                                                                                                                       | 1  |
| <i>BnaMYB106</i> | EL627196, EE502449, EE492636, EE555080, EE453474, EV060957, EV030094,<br>EV154290, EV154349                                                    | 9  |
| <i>BnaMYB108</i> | ES911647                                                                                                                                       | 1  |
| <i>BnaMYB109</i> | EE435105, EV021934, CX189597                                                                                                                   | 3  |
| <i>BnaMYB110</i> | FG568063, EE472472, EE483738, EV003085, FG569763, EE565229                                                                                     | 6  |
| <i>BnaMYB111</i> | ES920481, EV197885, EL630384, EV197794, CD838538, CD839606                                                                                     | 6  |
| <i>BnaMYB114</i> | EE489982, EE489704, EE490079                                                                                                                   | 3  |
| <i>BnaMYB116</i> | EV100953                                                                                                                                       | 1  |
| <i>BnaMYB117</i> | CD841933, CD841114                                                                                                                             | 2  |
| <i>BnaMYB118</i> | CD827885, CD828164, CD828310, CD819510, CD819263, FG561180, FG565690,<br>EV004266, EE500621, EE500392, EE499150, EV005206, EE472461, CD823403, | 15 |
| <i>BnaMYB122</i> | ES903348                                                                                                                                       | 1  |
| <i>BnaMYB123</i> | FG562315, EV033254, CD821188, EV060679, EV048548, EV027398, EV044112,<br>CD824329, EV079072                                                    | 9  |
| <i>BnaMYB124</i> | CX189696, DY011287                                                                                                                             | 2  |

---

**Table S2. Primers used in this study**

| <b>gene</b>     | <b>forward primer sequence(5-&gt;3')</b> | <b>reverse primer sequence(5-&gt;3')</b>  | <b>purpose</b>        |
|-----------------|------------------------------------------|-------------------------------------------|-----------------------|
| <i>BnaMYB1</i>  | TTAGGTCATGATCGAGAGAGAGATGTGGG<br>GACG    | CGCGTCGACTGTAGACAGGACATTGGTTCTGC          | cDNA cloning          |
|                 | TTAGGTCATGATCGAGAGAGAGATGTGGG            | CGCGTCGACTGTAGACAGGACATTGGTTCTGC          | transactivation assay |
| <i>BnaMYB3</i>  | GGAACCCTCTTCCTTCCTTG                     | GCATTACAAGACATTAAAGGCACA                  | cDNA cloning          |
|                 | CGCCATGGGAAGGTCACCATGC                   | CCCCCGGGCTAAAGAATTTTCGATTCCCA             | transactivation assay |
|                 | TCCAGCGACGACCAAGAGTTA                    | AAGTACGACAATTCCGACACGAC                   | qRT-PCR               |
| <i>BnaMYB4</i>  | CGCCATGGGAAGGTCACCATGTTGT                | CGCGTCGACTATCATCTCCAAGCTTCGAAAACC<br>TAA  | cDNA cloning          |
|                 | CGCCATGGGAAGGTCACCGTGTTGTGAG             | CGCGTCGACTTTCATCTCCAAGCTTCTAAAACC<br>AAAA | cDNA cloning          |
|                 | CGCCATGGGAAGGTCACCATGTTGT                | CGCGTCGACTATCATCTCCAAGCTTCGAAAACC<br>TAA  | transactivation assay |
|                 | GGACTAGTATGGGAAGGTCACCATGTTG             | CGCGTCGACTATCATCTCCAAGCTTCGAAAACC         | protoplast assay      |
| <i>BnaMYB7</i>  | GGAATTCCATATGGGAAGATCTCCCTGCTG           | CGCGTCGACGTTTCATTTCCAAGCTCCGAAAATC        | cDNA cloning          |
|                 | GGAATTCCATATGGGAAGATCTCCCTGCTG           | CGCGTCGACGTTTCATTTCCAAGCTCCGAAAATC        | transactivation assay |
| <i>BnaMYB12</i> | TCCATTGCTCGAGTCTTG                       | TCACATAACAATACGGTGCTCAA                   | cDNA cloning          |
|                 | CGCCATGGGAAGAGCGCCGTG                    | CGCGTCGACAGAGAGAAGCCATGCGAC               | transactivation assay |
|                 | GAGGCCACGATCGGGAAAAG                     | AGAGAAGCCATGCGACCAAC                      | qRT-PCR               |
| <i>BnaMYB13</i> | TTAGGTCATGATCGGGAGAAGACCATGCT<br>GTGA    | CGCGTCGACGAAAATGTCGGAATTTTCTCCAGT<br>TG   | cDNA cloning          |
|                 | TTAGGTCATGATCGGGAGAAGACCATGCT<br>GTGA    | CGCGTCGACGAAAATGTCGGAATTTTCTCCAGT<br>TG   | transactivation assay |
|                 | CCCAACAACAATCTAGCAGCAGTA                 | ACGTCGCAGAGTCTTTGATGTT                    | qRT-PCR               |
| <i>BnaMYB15</i> | TTAGGTCATGATCGGAAGAGCTCCATGCTG           | CGCGTCGACGAGCCCAGCTAGTAGATCTTG            | cDNA cloning          |
|                 | TTAGGTCATGATCGGAAGAGCTCCATGCTG           | CGCGTCGACGAGCCCAGCTAGTAGATCTTG            | transactivation assay |
| <i>BnaMYB16</i> | GCCAAAAACACCATTCCTTTG                    | TCATTTTCGTGGAACATTCATCC                   | cDNA cloning          |
|                 | GGAATTCATGGGTAGATCACCGTGC                | CGCGTCGACGAACATAGGCGTTGAATCG              | transactivation assay |
|                 | AGGGCTCACGGGTCTCTTG                      | GCCGGCCGTCTCGTTTTTAT                      | qRT-PCR               |

|                 |                                                                                                                                        |                                                                                                                                                      |                                                                                               |
|-----------------|----------------------------------------------------------------------------------------------------------------------------------------|------------------------------------------------------------------------------------------------------------------------------------------------------|-----------------------------------------------------------------------------------------------|
| <i>BnaMYB28</i> | GGACTAGTGGTAGATCACCGTGCTGT<br>GGAATTCATGTCAAGAAAGCCATGTTGTGT<br>GGAATTCATGTCAAGAAAGCCATGTTGTGT                                         | CGCGTCGACGAACATAGGCGTTGAATCG<br>CGCGTCGACTTCAGAGGGAATCATAATCCATG<br>CGCGTCGACTTCAGAGGGAATCATAATCCATG                                                 | GFP fusion<br>cDNA cloning<br>transactivation assay                                           |
| <i>BnaMYB30</i> | GCAAAAAGAGAAAAGGGAGTGA                                                                                                                 | TTTCAGGCCCTAGTGATTTT                                                                                                                                 | cDNA cloning                                                                                  |
| <i>BnaMYB31</i> | GGAATTCATGGTGAGACCCCCTTGT<br>GGAATTCCATATGGGTAGACCACCTTGTTG<br>GGAATTCCATATGGGTAGACCACCTTGTTG                                          | CGCGTCGACGAAGAAATTAGGGTTTTTCATC<br>CGCGTCGACGGACAAATCTTGACCGTTGTTGC<br>CGCGTCGACGGACAAATCTTGACCGTTGTTGC                                              | transactivation assay<br>cDNA cloning<br>transactivation assay                                |
| <i>BnaMYB32</i> | TTAGGTCATGATCGGGAGGTCTCCATGCTG<br>C<br>TTAGGTCATGATCGGGAGGTCTCCATGCTG<br>C<br>AAGGAGGAAAGTTCTAGGGAGGAG<br>CGGGATCCATGGGGAGGTCTCCATGCTG | CGCGTCGACGTTTCATTTCCAAGCTAGTATAATC<br>CAAG<br>CGCGTCGACGTTTCATTTCCAAGCTAGTATAATC<br>CAAG<br>CCATGGCGGGCTGATTCT<br>CGCGTCGACGTTTCATTTCCAAGCTAGTATAATC | cDNA cloning<br>transactivation assay<br>transactivation assay<br>qRT-PCR<br>protoplast assay |
| <i>BnaMYB34</i> | CGCCATGGTGAGAACACCATGCTGC<br>CGCCATGGTGAGAACACCATGCTGC                                                                                 | CCCTCGAGGACAAAGACACCAATCTTGGAATC<br>CCCTCGAGGACAAAGACACCAATCTTGGAATC                                                                                 | cDNA cloning                                                                                  |
| <i>BnaMYB38</i> | CGGAATTCATGGGAAGGGCTCCATGTTGTG<br>CGGAATTCATGGGAAGGGCTCCATGTTGTG<br>GGACTAGTGGGAAGGGCTCCATGTTGTG                                       | CGCGTCGACATAGTACAACATGAACGTATCAT<br>CGCGTCGACATAGTACAACATGAACGTATCAT<br>CGCGTCGACATAGTACAACATGAACGTATCAT                                             | transactivation assay<br>GFP fusion<br>cDNA cloning<br>transactivation assay                  |
| <i>BnaMYB41</i> | TTAGGTCATGATCGGAAGATTACCTTGTTG                                                                                                         | CGCGTCGACAAGCAACCCCATAAAGTCATCAA                                                                                                                     | GFP fusion<br>cDNA cloning                                                                    |
| <i>BnaMYB43</i> | GGAATTCCATATGGGGAGGCAGCCATGTT<br>GT<br>GGAATTCCATATGGGGAGGCAGCCATGTT<br>GT                                                             | CGCGTCGACATCTAAAACCATTCTTGAACATCC<br>GC<br>CGCGTCGACATCTAAAACCATTCTTGAACATCC<br>GC                                                                   | cDNA cloning<br>transactivation assay                                                         |
| <i>BnaMYB44</i> | TCACAACAAAACAGAGCTTCTCA<br>TTAGGTCATGATCGCGGATCGTATTAAAGG                                                                              | CGAGATCGCTCACTCGATTT<br>CCCTCGAGCTACTCGATTCTTCCAACTCC                                                                                                | cDNA cloning<br>transactivation assay                                                         |
| <i>BnaMYB46</i> | CAGCGAGGAGTCAAACCGTAGTCA<br>CGCCATGGTAAGGAAACCAGAGGTAGGAA<br>CGCCATGGTAAGGAAACCAGAGGTAGGAA                                             | TCACCTCCGCCTTAATCATCTCCT<br>CGCGTCGACTGTGCTTTGTTTGAAGTTGAAGTG<br>CGCGTCGACTGTGCTTTGTTTGAAGTTGAAGTG                                                   | qRT-PCR<br>cDNA cloning<br>transactivation assay                                              |

|                 |                                                                                                                                                       |                                                                                                                                                       |                                                                |
|-----------------|-------------------------------------------------------------------------------------------------------------------------------------------------------|-------------------------------------------------------------------------------------------------------------------------------------------------------|----------------------------------------------------------------|
| <i>BnaMYB47</i> | CAGGGCTACAAGGGGAACTCTACT<br>CGCCATGGGGAGGAAGACGTGG<br>CGCCATGGGGAGGAAGACGTGG                                                                          | GGTCCCAATATTCTTCCACTCTCA<br>CGCGTCGACGAAGAGATAATCAAGTATCTGAG<br>CGCGTCGACGAAGAGATAATCAAGTATCTGAG                                                      | qRT-PCR<br>cDNA cloning<br>transactivation assay               |
| <i>BnaMYB48</i> | GAAGAAAGAGGATGAATATGATGCAAGAG                                                                                                                         | TTTTCAACGAATGAATGGAATCCT                                                                                                                              | cDNA cloning                                                   |
| <i>BnaMYB51</i> | CGCCATGGTGC GGACACCGTGTTGC<br>CGCCATGGTGC GGACACCGTGTTGC                                                                                              | CGCGTCGACTGCAAATAGTTATCAATATCTTC<br>CGCGTCGACTGCAAATAGTTATCAATATCTTC                                                                                  | cDNA cloning<br>transactivation assay                          |
| <i>BnaMYB56</i> | GAAAGAAAATGAATCCAAATCTCCTTGAG<br>TTAGGTCATGAATCCAAATCTCCTTGA<br>GTGGCCATTACTTCTTTGATTTTC                                                              | TCCTACCCCGGCTAACTTCT<br>CGCGTCGACAGAAGCTCCA ACTCCAAG<br>CCTACCCCGGCTAACTTCTACC                                                                        | cDNA cloning<br>transactivation assay<br>qRT-PCR               |
| <i>BnaMYB58</i> | GGAATTCATATGGGCAAAGGGAGAGCTC<br>CA                                                                                                                    | CGCGTCGACATGATTTATCAGGACCTCATAACT<br>CTC                                                                                                              | cDNA cloning                                                   |
| <i>BnaMYB59</i> | TGAGATGAAAAATGTGCAAGAAGA                                                                                                                              | TTTTGAGAAAAAGGGAGATGGA                                                                                                                                | cDNA cloning                                                   |
| <i>BnaMYB61</i> | TCCCTCCTTAGCACAGCATT                                                                                                                                  | ACCCCATGAATACCACTTGAA                                                                                                                                 | cDNA cloning                                                   |
| <i>BnaMYB62</i> | TTAGGTCATGATCGGTAGACATTCTTGCTG<br>GAGCCAAAGCCAGAACGAGAAT                                                                                              | CGCGTCGACAAGAGACTGACCAAAGAGAC<br>ACCCCATGAATACCACTTGAAACC                                                                                             | transactivation assay<br>qRT-PCR                               |
|                 | CGCCATGGAAAATTCAATGAAGAACAAGA<br>CGCCATGGAAAATTCAATGAAGAACAAGA<br>CGCCATGGAAAATTCAATGAAGAACAAGA                                                       | CGCGTCGACCTCCCTAAACTGCCAAATGTCATC<br>CGCGTCGACCTCCCTAAACTGCCAAATGTCATC<br>CGCGTCGACCTCCCTAAACTGCCAAATGTCATC                                           | cDNA cloning<br>transactivation assay<br>GFP fusion            |
|                 | CAGAAGACGTGTTGAGAAGAAAAA<br>GGAATTCATATGTCAGGTCCGTCTAGAAA<br>AGTTACATGGCGGATTTACAGAGA<br>GGACTAGTTCAGGTCCGTCTAGAAAGAA                                 | TTTGCTTCCTTGTTCTGTCTCTC<br>CGCGTCGACCTCCATCTTCCCAATACCGA<br>TTGCCCGAGAAACAGAGTGAAAAA<br>CGCGTCGACCTCCATCTTCCCAATACCGA                                 | cDNA cloning<br>transactivation assay<br>qRT-PCR<br>GFP fusion |
| <i>BnaMYB77</i> | GTGACCTCACTCCTGTCATTCG<br>TTAGGTCATGATCGCGGATCGCGTGAAAG<br>GGCGCGTAGAGCTGAGTTTATGAC<br>TTAGGTCATGATCGCGGATCGCGTGAAAG<br>GGACTAGTATGGCGGATCGCGTGAAAGGT | CATTTGACCACAACCCAAATCTG<br>CGCGTCGACCTCAACCTTAGGTGTGATTC<br>ATCCACCACCGTTGTTTCTCTGC<br>CGCGTCGACCTCAACCTTAGGTGTGATTC<br>CGCGTCGACCTCAACCTTAGGTGTGATTC | cDNA cloning<br>transactivation assay<br>qRT-PCR<br>GFP fusion |
| <i>BnaMYB78</i> | TTAGGTCATGATCGACGGCAAAGAAGCT<br>TAGAGATC<br>GGACTAGTATGGACGGCAAAGAAGCTTA                                                                              | CGCGTCGACGAAGCTTCCATTGTTGAGGAGC<br>CGCGTCGACGAAGCTTCCATTGTTGAGGAGC                                                                                    | protoplast assay<br>cDNA cloning<br>overexpression             |

|                  |                                |                                   |                       |
|------------------|--------------------------------|-----------------------------------|-----------------------|
|                  | GGACTAGTATGGACGGCAAAGAAGCTTA   | CGCGTCGACGAAGCTTCCATTGTTGAGGAGC   | GFP fusion            |
|                  | GGAATTCCATATGGACGGCAAAGAAGCT   | CGCGTCGACGAAGCTTCCATTGTTGAGGAGC   | transactivation assay |
|                  | GGACTAGTATGGACGGCAAAGAAGCTTA   | CGCGTCGACGAAGCTTCCATTGTTGAGGAGC   | protoplast assay      |
| <i>BnaMYB81</i>  | TTAGGTCATGATCGGTAAAGTTCGCCATGA | CGCGTCGACCTTGGTGTAGTCCCTATCCTCAC  | cDNA cloning          |
|                  | TTAGGTCATGATCGGTAAAGTTCGCCATGA | CGCGTCGACCTTGGTGTAGTCCCTATCCTCAC  | transactivation assay |
| <i>BnaMYB88</i>  | GGAATTCCATATGGAAGAGACAAGGAAGA  | CGCGTCGACGTATCCGGGTTTGACCCTAAA    | cDNA cloning          |
|                  | GGAATTCCATATGGAAGAGACAAGGAAGA  | CGCGTCGACGTATCCGGGTTTGACCCTAAA    | transactivation assay |
| <i>BnaMYB90</i>  | TTAGGTCATGATCGAGGATTCGTCCAAAGG | CGCGTCGACATCAAGTTCTACAGTCTCTCCATC | cDNA cloning          |
|                  | TTAGGTCATGATCGAGGATTCGTCCAAAGG | CGCGTCGACATCAAGTTCTACAGTCTCTCCATC | transactivation assay |
|                  | GGTGGGAGAGTTTGCTAGAGGAGAG      | AAGGTTGCCCCCATTTTTGTTG            | qRT-PCR               |
| <i>BnaMYB91</i>  | TTAGGTCATGAAGGAGAGGCAACGTTGGA  | CGCGTCGACTGGCCGGTCTAATAGCCTCTG    | cDNA cloning          |
|                  | TTAGGTCATGAAGGAGAGGCAACGTTGGA  | CGCGTCGACTGGCCGGTCTAATAGCCTCTG    | transactivation assay |
|                  | GGACTAGTATGAAGGAGAGGCAACGTTGG  | CGCGTCGACTGGCCGGTCTAATAGCCTCTG    | protoplast assay      |
| <i>BnaMYB92</i>  | CGCCATGGGAAGATCTCCTTGTAGTGATGA | CGCGTCGACAAGAATGTTGGAAAATATGGAAT  | cDNA cloning          |
|                  | CGCCATGGGAAGATCTCCTTGTAGTGATGA | CGCGTCGACAAGAATGTTGGAAAATATGGAAT  | transactivation assay |
| <i>BnaMYB95</i>  | CGGAATTCATGGGGAGGACGACGTG      | CGCGTCGACAAGGAGGAACAGGTCAAGTTG    | cDNA cloning          |
|                  | CGGAATTCATGGGGAGGACGACGTG      | CGCGTCGACAAGGAGGAACAGGTCAAGTTG    | transactivation assay |
|                  | TAGGCAAGGAAGATGAGGAAGTGA       | CAGCGACGAAGCCAGGTGTAT             | qRT-PCR               |
| <i>BnaMYB96</i>  | GGAATTCCATATGGGAAGACCACCTTGTTG | CGCGTCGACGAAAATTGCTTCTTGTCTTCTAA  | cDNA cloning          |
|                  | GGAATTCCATATGGGAAGACCACCTTGTTG | CGCGTCGACGAAAATTGCTTCTTGTCTTCTAA  | transactivation assay |
| <i>BnaMYB106</i> | GGTGGACCATCATGATCATCTAATG      | TTGGGAAGCTATCGACATTACA            | cDNA cloning          |
|                  | TTAGGTCATGATCGGAAGATCGCCGTGCTG | CCCTCGAGGAACATGGTTGATGAATCG       | transactivation assay |
|                  | CGGCAGAAGGAATTGAAGAAGG         | ATGAATCGGACGGTGTGGAATC            | qRT-PCR               |
| <i>BnaMYB108</i> | GGAATTCCATATGGATGAGAAAGGAAGAA  | CGCGTCGACGAAGTCGTTATTATTGTTGAACTG | cDNA cloning          |
|                  | GCTTC                          | TTG                               |                       |
|                  | GGAATTCCATATGGATGAGAAAGGAAGAA  | CGCGTCGACGAAGTCGTTATTATTGTTGAACTG | transactivation assay |
|                  | GCTTC                          | TTG                               |                       |
|                  | GCCTCCGCCGCATCATTA             | GTTCCGGTTTTGGAGCGTTGTAGTA         | qRT-PCR               |
|                  | GGACTAGTGATGAGAAAGGAAGGAAGCTT  | CGCGTCGACGAAGTCGTTATTATTGTTGAACTG | GFP fusion            |
| <i>BnaMYB109</i> | CGCCATGGATCGATCGGAGCCGTTAC     | CGCGTCGACGCTTCTTGCACAAAAGAAATGTT  | cDNA cloning          |

|                  |                                            |                                          |                            |
|------------------|--------------------------------------------|------------------------------------------|----------------------------|
|                  | CGCCATGGATCGATCGGAGCCGTTAC                 | CGCGTCGACGCTTCTTGCACAAAAGAAATGTT<br>G    | transactivation assay      |
| <i>BnaMYB111</i> | CGCCATGGGAAGGGCTCCTTGTTGT                  | CGCGTCGACTATGCTATCCACTTGCTGTATTTTC<br>TC | cDNA cloning               |
|                  | CGCCATGGGAAGGGCTCCTTGTTGT                  | CGCGTCGACTATGCTATCCACTTGCTGTATTTTC<br>TC | transactivation assay      |
| <i>BnaMYB116</i> | TTAGGTCATGATCTCAAATATAATGAAGAA             | CGCGTCGACAACATCCATTTCAATGGGTTC           | cDNA cloning               |
|                  | TTAGGTCATGATCTCAAATATAATGAAGAA             | CGCGTCGACAACATCCATTTCAATGGGTTC           | transactivation assay      |
| <i>BnaMYB122</i> | CGCCATGGTACGGACACCGTGTTGC                  | CGCGTCGACCCAAACCAGTTGTCAATCCC            | cDNA cloning               |
|                  | CGCCATGGTACGGACACCGTGTTGC                  | CGCGTCGACTCCAAACCAGTTGTCAATCCC           | transactivation assay      |
| <i>BnaMYB123</i> | CGCCATGGTAATGAGAAAGAGAGAAAGTA<br>GTAAGGTGA | CGCGTCGACACAATTAAGTCCCAGAGACAAT<br>CTTC  | cDNA cloning               |
| <i>BnaMYB124</i> | CGCCATGGAAGATACGAAGAAGAAAAAGA              | CGCGTCGACTTAGGGATGATGATGGATCAGAG         | cDNA cloning               |
|                  | CGCCATGGAAGATACGAAGAAGAAAAAGA              | CGCGTCGACTTAGGGATGATGATGGATCAGAG         | transactivation assay      |
| <i>BnaUP1</i>    | AGCCTGAGGAGATATTAGCAGGAA                   | ATCTCACTGCAGCTCCACCAT                    | qRT-PCR, reference<br>gene |
| <i>BnaUBC9</i>   | GCATCTGCCTCGACATCTTGA                      | GACAGCAGCACCTTGGAATG                     | qRT-PCR, reference<br>gene |
| <i>GUS</i>       | CGCCATGGTAGATCTGAGGGTAAA                   | CGCGTCGACCACGTGATGGTGATGGTGAT            | overexpression             |
| <i>NbRbohA</i>   | GGCAAGCAGGAAAGATCAGACACG                   | CGCAAAAGCAAAGAAGAAGAAAA                  | qRT-PCR                    |
| <i>NbRbohB</i>   | CAGTCTCTTACCATGCCAAAAA                     | CCCACAATAGAAGACCCCAACT                   | qRT-PCR                    |
| <i>NbAOX1a</i>   | TGAGACGGCAGTAGAGCACAATG                    | AAGGGCAATCAATCAATCAAAACA                 | qRT-PCR                    |
| <i>NbAPX1</i>    | GGAGTGGTTGCTGTTGAAGTC                      | GGAGAGCCTTGTCTGATGG                      | qRT-PCR                    |
| <i>NbAPX6</i>    | TTCCCGATGCTGGTCCTCCTTCC                    | TGCCCAACCACTACGCTCTG                     | qRT-PCR                    |
| <i>NbCAT3</i>    | TGCGCATCACAATAATCACCAT                     | TGTCGCGCTTTCCTGTCAA                      | qRT-PCR                    |
| <i>NbGPX2</i>    | TTGTTTTGCCACTACCTTGTTTCAG                  | TTCATTTGGGGGTGTCAGATTAG                  | qRT-PCR                    |
| <i>NbGST</i>     | TGAAGGAAAGCGAAGCACAAT                      | ACGACGGCGGAATCAAACA                      | qRT-PCR                    |
| <i>NbSOD</i>     | GCCGTCCTTAGCAGCAGTGAA                      | CCGGGTTTTAGGCCAGAGACAT                   | qRT-PCR                    |
| <i>NbMC4</i>     | TGGTAACGGGGAGGGTGAAAGTGG                   | TCCTGAACCGGCATAAACCTCCTG                 | qRT-PCR                    |
| <i>NbMC8</i>     | CTGCAGGCGGAGACTCTTATGGTG                   | GCCTGGGCGTTGCGTGTAGC                     | qRT-PCR                    |
| <i>NbVPE1a</i>   | ACAGGGTAGAAGCGCATCATTAT                    | AGCTTACATTCCCTTCCAAACTG                  | qRT-PCR                    |



|                    |                                               |                                               |                            |
|--------------------|-----------------------------------------------|-----------------------------------------------|----------------------------|
| <i>NbVPE1b</i>     | TCCCAGCGTCCCATCCAATACTT                       | CAATAATGATGCGCTTCTAACCTGT                     | qRT-PCR                    |
| <i>NbVPE3</i>      | CTCTGTTGGCATAATGGCTTCTCT                      | CTGCATACCTTCTTTCTCCCTCTG                      | qRT-PCR                    |
| <i>NbACRE31</i>    | AAGGTCCCCTCTTCGTCGGATCTTCG                    | AAGAATTCGGCCATCGTGATCTTGGTC                   | qRT-PCR                    |
| <i>NbACRE132</i>   | AAGGTCCAGCGAAGTCTCTGAGGGTGA                   | AAGAATTCCAATCCTAGCTCTGGCTCCTG                 | qRT-PCR                    |
| <i>NbCYP71D20</i>  | AAGGTCCACCGCACCATGTCCTTAGAG                   | AAGAATTCCTTGCCCTTGAGTACTTGC                   | qRT-PCR                    |
| <i>NbCP23</i>      | GCTGTGGGTTACGGTGTGAAAATGGT                    | AAACTCAGGCAACGACAGGGTAGGATG                   | qRT-PCR                    |
| <i>NbHIN1</i>      | CTTCCATACCGCCACCAGCAAATCC                     | GCAAAGGCAGCCGAAGAGACAGC                       | qRT-PCR                    |
| <i>NbPR2</i>       | AAGCCTGGACCTATTGAAACCTAT                      | AACCGAACTGTCCCAAACCTCCAC                      | qRT-PCR                    |
| <i>NbPR5</i>       | CCCGGCGCAACTATCCAACCTCTCC                     | GCCGCCACCGATGCACTTCAAT                        | qRT-PCR                    |
| <i>NbSAG12</i>     | ATATGGGATGTGAGGGAGGTCTTA                      | TCAATGGCAACGGATACAGGT                         | qRT-PCR                    |
| <i>NbSAG101</i>    | TGGAAGAGGCTGGGTATTATGACA                      | GCCAACGCTTTTCGGAGATTTC                        | qRT-PCR                    |
| <i>NbZAT12</i>     | CGGTTCGTCGGAAAGAAGATGATA                      | TCGCAAAACCGGAGATGAAAC                         | qRT-PCR                    |
| <i>NbPP2A</i>      | GACCCTGATGTTGATGTTTCGCT                       | GAGGGATTTGAAGAGAGATTTC                        | qRT-PCR, reference<br>gene |
| <i>NbL23</i>       | AAGGATGCCGTGAAGAAGATGT                        | GCATCGTAGTCAGGAGTCAACC                        | qRT-PCR, reference<br>gene |
| <i>NbF-box</i>     | GGCACTCACAAACGTCTATTTC                        | ACCTGGGAGGCATCCTGCTTAT                        | qRT-PCR, reference<br>gene |
| <i>ProNbRbohB</i>  | GGGGTACCCTGCTAAAAATAAAGATTTCT<br>TGAAATTTC    | CGCCATGGCTATAGTTTTTTCTTTGAGAAATAA<br>TA       | fLUC fusion                |
| <i>ProNbHIN1</i>   | GGGGTACCAACCACGTACACAAGATTTCA<br>ACA          | CGCCATGGCTCAAGAAAAATAAAGTACAGATT<br>ATATTGCTT | fLUC fusion                |
| <i>ProNbGST</i>    | GGGGTACCACCCCCCTTTTTTTTTTTTAA<br>A            | CGCCATGGTTTCTGGATATACAGCTAAAGATA<br>AAGAAT    | fLUC fusion                |
| <i>ProBnaRbohA</i> | GGGGTACCCTATTTGTCTAACCAAAAATTT<br>AACATAAAGCT | CGCCATGGGAAGATCCAGCGAACACTAGGGAT              | fLUC fusion                |
| <i>ProBnaRbohB</i> | GGGGTACCGCAAACCTTTTAATATACCTTTT<br>CAACGGTT   | CGCCATGGTGTTTCAAAGGATGAAAAAAGAG<br>ATAATCAC   | fLUC fusion                |
| <i>ProBnaGST1</i>  | GGGGTACCGGTGGTTGATTATTTCTCTGAT<br>TTTAATGT    | CGCCATGGACTAATGCTTGTTTTGTTTTGTTTT<br>TCTT     | fLUC fusion                |

*ProBnaHINI* GGGTACCAATCCCAACTTGGGTCCACATT CGCCATGGTTCAGGTTGTGGAGGTTAGAATTA fLUC fusion  
ATG

---

Restriction sites were underlined.

**Table S3: R2R3 type MYB genes identified from lower species**

| <b>species</b>                    | <b>Gene model</b> | <b>Description</b>          | <b>Type</b> | <b>code</b> |
|-----------------------------------|-------------------|-----------------------------|-------------|-------------|
| <i>Ostreococcus tauri</i>         | 17156             | e_gw1.05.00.32.1            | R2R3        | OtMYB1      |
|                                   | 23487             | estExt_fgenesh1_pg.C_Chr_0  | R2R3        | OtMYB2      |
|                                   | 36773             | 1500010069                  | R2R3        | OtMYB3      |
| <i>Chlamydomonas reinhardtii</i>  | 205725            | OVA_Chltre2_kg.scaffold_500 | R2R3        | CrMYB1      |
|                                   | 376761            | estExt_fgenesh1_pm.C_chrom  | R2R3        | CrMYB2      |
|                                   | 377858            | estExt_fgenesh1_pm.C_chrom  | R2R3        | CrMYB3      |
|                                   | 100734            | e_gw1.23.519.1              | R2R3        | SmMYB1      |
| <i>Selaginella moellendorffii</i> | 113921            | e_gw1.47.324.1              | R2R3        | SmMYB2      |
|                                   | 140962            | estExt_Genewise1.C_11907    | R2R3        | SmMYB3      |
|                                   | 179572            | estExt_Genewise1Plus.C_540  | R2R3        | SmMYB4      |
|                                   | 233652            | fgenesh1_pm.C_scaffold_470  | R2R3        | SmMYB5      |
|                                   | 437219            | estExt_fgenesh2_pg.C_00034  | R2R3        | SmMYB6      |

Note: The respective sequences were identified from Phytozome database and subjected to domain analysis in the SMART program.

|             |   |                                                              |
|-------------|---|--------------------------------------------------------------|
| BnaMYB1     | 1 | -----MEREMWGRSGIG-----EIEEAVAG-GRRDEHDGGV                    |
| AtMYB1      | 1 | -----MEAEIVRRSEVTGLRREVEESSIGRGDCDGDGGDV                     |
| BnaMYB109   | 1 | -----MDRSEPLPFPSADSVKV                                       |
| BnaMYB44    | 1 | -----                                                        |
| BnaMYB77    | 1 | -----                                                        |
| BnaMYB73    | 1 | -----                                                        |
| BnaMYB96-1  | 1 | -----                                                        |
| BnaMYB96-2  | 1 | -----                                                        |
| BnaMYB30    | 1 | -----                                                        |
| BnaMYB31    | 1 | -----                                                        |
| AtMYB0_GL1  | 1 | -----                                                        |
| BnaMYB4-1   | 1 | -----                                                        |
| BnaMYB4-2   | 1 | -----                                                        |
| BnaMYB4-3   | 1 | -----                                                        |
| BnaMYB32-1  | 1 | -----                                                        |
| BnaMYB32-2  | 1 | -----                                                        |
| BnaMYB7     | 1 | -----                                                        |
| BnaMYB3     | 1 | -----                                                        |
| BnaMYB51    | 1 | -----                                                        |
| BnaMYB122   | 1 | -----                                                        |
| BnaMYB34    | 1 | -----                                                        |
| BnaMYB16    | 1 | -----                                                        |
| BnaMYB106   | 1 | -----                                                        |
| BnaMYB47    | 1 | -----                                                        |
| BnaMYB95    | 1 | -----                                                        |
| BnaMYB41    | 1 | -----                                                        |
| BnaMYB92    | 1 | -----                                                        |
| BnaMYB43-1  | 1 | -----                                                        |
| BnaMYB43-2  | 1 | -----                                                        |
| BnaMYB12    | 1 | -----                                                        |
| BnaMYB111   | 1 | -----                                                        |
| BnaMYB13    | 1 | -----                                                        |
| BnaMYB15    | 1 | -----                                                        |
| BnaMYB58    | 1 | -----                                                        |
| BnaMYB123-1 | 1 | -----                                                        |
| BnaMYB123-2 | 1 | -----                                                        |
| BnaMYB81-1  | 1 | -----MIG                                                     |
| BnaMYB81-2  | 1 | -----MIG                                                     |
| BnaMYB48    | 1 | -----                                                        |
| BnaMYB59    | 1 | -----                                                        |
| BnaMYB62    | 1 | -----MEN                                                     |
| BnaMYB116   | 1 | -----MSN                                                     |
| BnaMYB78-1  | 1 | -----MDGKRSLEM                                               |
| BnaMYB78-2  | 1 | -----MDGKRSLEI                                               |
| BnaMYB108-1 | 1 | -----M                                                       |
| BnaMYB108-2 | 1 | -----M                                                       |
| OsMYB2      | 1 | -----MDM                                                     |
| BnaMYB91-1  | 1 | -----                                                        |
| BnaMYB91-2  | 1 | -----                                                        |
| BnaMYB88    | 1 | -----MEE                                                     |
| BnaMYB124   | 1 | -----MED                                                     |
| BnaMYB28    | 1 | -----                                                        |
| ZmC1        | 1 | -----                                                        |
| BnaMYB38    | 1 | -----                                                        |
| BnaMYB61    | 1 | -----                                                        |
| BnaMYB46    | 1 | -----                                                        |
| BnaMYB90    | 1 | -----                                                        |
| BnaMYB56    | 1 | MNPNLLEKDQTSNETIHGSRRFKEANNFRSSPKSHTNFSLARNHPLNKTFPVLKSEDEHE |
| consensus   | 1 |                                                              |

BnaMYB1 31 AMFVVG--EGTSCR**RRKKR**IKGTWSREEDVMSSELVEKFGPR-NWSLWARSIP---GRSGK  
 AtMYB1 36 GEDAAGFVGTSGRGRDRVKGPWSKEEDVLSSELVKRLGAR-NWSFIARSIP---GRSGK  
 BnaMYB109 19 TTAAAGDSSGGYBIKSKVKGPWSTEEDAVLTKLVSKLGPR-NWSLARGIP---GRSGK  
 BnaMYB44 1 -----MADRKIGPWSPEEDEQLRKLIVKYGPR-NWTVLSKSIIP---GRSGK  
 BnaMYB77 1 -----MADRVKGPWSQEEDEQLRLMVEKYGPR-NWSATLSKSIIP---GRSGK  
 BnaMYB73 1 -----MSGPSRKNMERIKGPWSPEEDDLLQSLVQKHGPR-NWSLISKSIIP---GRSGK  
 BnaMYB96-1 1 -----MGRPP**CC**CKTG-VKKGAWTPEEDIILVSYIQEHGPG-NWRSVPTNT--GLRRCCK  
 BnaMYB96-2 1 -----MGRPP**CC**CKTG-VKKGAWTPEEDIILVSYIQEHGPG-NWRAVPTNT--GLRRCCK  
 BnaMYB30 1 -----MVRPP**CC**CKEG-VKKGAWTPEEDIILVSYIQEHGPG-NWRAVPTNT--GLRRCCK  
 BnaMYB31 1 -----MGRPP**CC**CKME-VKKGAWTPEEDIILVSYIQEHGPG-SWRCVPTNT--GLRRCCK  
 AtMYB0\_GL1 1 ---MRIRRRDEKENQE-YKKGLWTVEDNILMDYVLNHGTG-QWNRVLPKRT--GLKRCCK  
 BnaMYB4-1 1 -----MGRSP**CC**CKAH-TNKGAWTKEEDARLTAYIKAHGEG-CWRSPLPKAA--GLRRCCK  
 BnaMYB4-2 1 -----MGRSP**CC**CKAH-TNKGAWTKEEDARLTAYIKAHGEG-CWRSPLPKAA--GLRRCCK  
 BnaMYB4-3 1 -----MGRSP**CC**CKAH-TNKGAWTKEEDERLTAYIKAHGEG-CWRSPLPKAA--GLRRCCK  
 BnaMYB32-1 1 -----MGRSP**CC**CKDH-TNKGAWTKEEDQKLSYIKSHGEG-CWRSPLPASA--GLRRCCK  
 BnaMYB32-2 1 -----MGRSP**CC**CKDH-TNKGAWTKEEDQKLSYIKSHGEG-CWRSPLPASA--GLRRCCK  
 BnaMYB7 1 -----MGRSP**CC**CKEH-MNKGAWTKEEDERLVSYIKSHGEG-CWRSPLPAAA--GLRRCCK  
 BnaMYB3 1 -----MGRSP**CC**CKAH-MNKGAWTKEEDQLLVDIRKHGEG-CWRSPLPAAA--GLRRCCK  
 BnaMYB51 1 -----MVRT**PC**CKAELGLKKGAWTPEEDQKLVSYVNHGEG-GWRILPEKA--GLKRCCK  
 BnaMYB122 1 -----MVRT**PC**CRAELGLKKGAWTPEEDQKLVSYVNHGEG-GWRILPEKA--GLKRCCK  
 BnaMYB34 1 -----MVRT**PC**CKEEGLKKGAWTPEEDQKLVSYVNHGEG-GWRILPEKA--GLKRCCK  
 BnaMYB16 1 -----MGRSP**CC**CKMG-LKKGAWTSEEDQKLVSYVNHGEG-SWRSLEPKA--GLRRCCK  
 BnaMYB106 1 -----MGRSP**CC**CKAG-LKKGAWTPEEDQKLVSYVNHGEG-SWRSLEPKA--GLRRCCK  
 BnaMYB47 1 -----MGR**KTW**FD**DDG**MKKGAWTAEEDQKLVSYVNHGEG-SWRSLEPKA--GLRRCCK  
 BnaMYB95 1 -----MGR**TTW**FD**DDG**VRKGAWTAEEDQKLVSYVNHGEG-SWRSLEPKA--GLRRCCK  
 BnaMYB41 1 -----MIG**RLP**CC**CK**NG-VKKGAWTPEEDQKLVSYVNHGEG-SWRSLEPKA--GLRRCCK  
 BnaMYB92 1 -----MGRSP**CC**SDSG-LKKGAWTPEEDQKLVSYVNHGEG-SWRSLEPKA--GLRRCCK  
 BnaMYB43-1 1 -----MGR**QP**CC**CK**VGLKKGAWTAEEDQKLVSYVNHGEG-SWRSLEPKA--GLRRCCK  
 BnaMYB43-2 1 -----MGR**QP**CC**CK**VGLKKGAWTAEEDQKLVSYVNHGEG-SWRSLEPKA--GLRRCCK  
 BnaMYB12 1 -----MGRAP**CC**CKVGLKGRWTAEEEDQKLVSYVNHGEG-SWRSLEPKA--GLRRCCK  
 BnaMYB111 1 -----MGRAP**CC**CKIG-LKGRWTAEEEDQKLVSYVNHGEG-SWRSLEPKA--GLRRCCK  
 BnaMYB13 1 -----MGR**RP**CC**CK**MG-LKKGAWTAEEDQKLVSYVNHGEG-SWRSLEPKA--GLRRCCK  
 BnaMYB15 1 -----MGRAP**CC**CKMG-LNKGAWTPEEDQKLVSYVNHGEG-SWRSLEPKA--GLRRCCK  
 BnaMYB58 1 ---MG**KGR**AP**CC**CKTK-VKRGWTSQEDDKLVSFIHKYGE-NWRSLEPKA--GLRRCCK  
 BnaMYB123-1 1 ---MM**KR**RESSKVKKEELNRGAWTQEDDKLVSFIHKYGE-NWRSLEPKA--GLRRCCK  
 BnaMYB123-2 1 ---MM**KR**RESSKVKKEELNRGAWTQEDDKLVSFIHKYGE-NWRSLEPKA--GLRRCCK  
 BnaMYB81-1 4 KVRHDSGSGKDFAIKTFHKGAWTSAEDQLLIGYVDKHGEG-NWNTVQKHS--GLRRCCK  
 BnaMYB81-2 4 KVRHDSGSGKDFAIKTFHKGAWTSAEDQLLIGYVDKHGEG-NWNTVQKHS--GLRRCCK  
 BnaMYB48 1 -----MN**MQ**EE-----NRKGAWTQEDIILVNFVHLFGDR-RWDFIAKVS--GLNRTGK  
 BnaMYB59 1 ---MKNVQEE-----YRKGAWTQEDIILVNFVHLFGDR-RWDFIAKVS--GLNRTGK  
 BnaMYB62 4 SMKNK**SF**KES---EEAKLRRGPWTL**EE**DTLLTTYILHNGEG-RWNLAACA--GLKRTGK  
 BnaMYB116 4 IM**KK**CNENE---ESAEQRKGAWT**LE**EDTLLTNYIAHNGEG-RWNLAACA--GL**KK**GK  
 BnaMYB78-1 10 NKNIGDFENN-VDEMDLRRGPWTL**EE**DFKLTNYIATHGEG-RWNSLSRCA--GLKRTGK  
 BnaMYB78-2 10 NKNMGDFENN-VDEMDLRRGPWTL**EE**DFKLTNYIATHGEG-RWNSLSRCA--GLKRTGK  
 BnaMYB108-1 2 DEKGRSFKNN-MDEMDLRRGPWTL**EE**DFKLTNYIATHGEG-RWNSLSRCA--GLQRTGK  
 BnaMYB108-2 2 DEKGRSFKNNMDEIDLRRGPWTL**EE**DFKLTNYIATHGEG-RWNSLSRCA--GLQRTGK  
 OsMYB2 4 AHERDASSEE-EVMGGDLRRGPWTL**EE**DLNLYIAAHGEG-RWNSLSRCA--GLKRTGK  
 BnaMYB91-1 1 -----MKERQRWSGEEDALLRAYVRQFGPR-EWHLVSERMKNKPLNRDAK  
 BnaMYB91-2 1 -----MKERQRWSGEEDALLRAYVRQFGPR-EWHLVSERMKNKPLNRDAK  
 BnaMYB88 4 **TR**KKKK-----D**S**KKKERHIVTWSQ**Q**EDDILRKQITLHGTD-NWAIIASNFS---DKSTR  
 BnaMYB124 4 **TK**KKKKNINNED**S**KKKERHIVT**W**APEEDVILRDQITLHGTE-NWAIIASKFK---DKSTR  
 BnaMYB28 1 -----MSR**KP**CC**V**GEG-LKKGAWT**TE**EDDKLVSFIHKYGE-GWRDIPQKAG--LKRRCCK  
 ZmC1 1 -----MGR**RAC**CA**K**EG-VKRGAWT**SK**EDDALAAYVKAHGE-KWREVPQKAG--LKRRCCK  
 BnaMYB38 1 -----MGRAP**CC**CKAN-VKRGWTSPEEDAKLVDYIEKQGTGGNWI**AL**PHKAG--LKRRCCK  
 BnaMYB61 1 -----MGR**HS**CC**Y**KQK-LRKGAWT**PE**EDDKLVSFIHKYGE-CWSSVPLKAG--LKRRCCK  
 BnaMYB46 1 -MRKPEVGSATHQVKKMKGLWSP**EE**DSRLM**Q**YMISSGQG-CWSDVAKNAG--LKRRCCK  
 BnaMYB90 1 -----ME**S**SKGLTKGAWT**AE**EDSLLRCDIKYGE-KWHPVPLRAG--LKRRCCK  
 BnaMYB56 61 SENGW**KRR**QSGIKAKVCSRGHW**R**PT**ED**AKL**KEL**V**AE**FC**PQ**-N**W**N**V**L**AN**HL---LGRSGK  
 consensus 61 . . . . . \* . \* . . . \* . \* . . . . .

R2 repeat

|             |     |                                                                  |
|-------------|-----|------------------------------------------------------------------|
| BnaMYB1     | 85  | SCRLRWCNQLDPSLKRNPFFTEVEDEAIIITAHATHGNKWSIIAKLLPGRTDNAIKNHNWAT   |
| AtMYB1      | 92  | SCRLRWCNQLNPNLIRNSFTEVEDEQAIIAAHATHGNKWAVIAKLLPGRTDNAIKNHNWNSA   |
| BnaMYB109   | 75  | SCRLRWCNQLDPCLEHRKPFSAEEDETIIRAHAAQFGNKWATIAARLLNGRGTDAVKNHNWNS  |
| BnaMYB44    | 43  | SCRLRWCNQLSPQVEHRPFSAEEDETIIRAHAAQFGNKWATIAARLLNGRGTDAVKNHNWNS   |
| BnaMYB77    | 43  | SCRLRWCNQLSPEVEHRPFSPEEDETIVSARAKFGNKWATIAARLLNGRGTDAVKNHNWNS    |
| BnaMYB73    | 50  | SCRLRWCNQLSPEVEHRAFTAEEDETIIRAHARFGNKWATISRLNGRGTDAVKNHNWNS      |
| BnaMYB96-1  | 52  | SCRLRWYNLRLPGIKRGNFTEHEEKMIVHLQALLGNRWAAIASYLPERTDNDIKNYWNTH     |
| BnaMYB96-2  | 52  | SCRLRWYNLRLPGIKRGNFTEHEEKMIVHLQALLGNRWAAIASYLPERTDNDIKNYWNTH     |
| BnaMYB30    | 52  | SCRLRWYNLRLPGIKRGNFTEHEEKMIVHLQALLGNRWAAIASYLPERTDNDIKNYWNTH     |
| BnaMYB31    | 52  | SCRLRWYNLRLPGIKRGNFTEHEEKMIVHLQALLGNRWAAIASYLPERTDNDIKNYWNTH     |
| AtMYB0_GL1  | 54  | SCRLRWYNLSPNVNKGNFTEQEEDELIIRLHKLGNRWSLIAKRVPGRTDNOVKNYWNTH      |
| BnaMYB4-1   | 52  | SCRLRWYNLRLPDLKRCNFTEDEDELI IKLHSLGNKWSLIAARLPGRTDNEIKNYWNTH     |
| BnaMYB4-2   | 52  | SCRLRWYNLRLPDLKRCNFTEDEDELI IKLHSLGNKWSLIAARLPGRTDNEIKNYWNTH     |
| BnaMYB4-3   | 52  | SCRLRWYNLRLPDLKRCNFTEDEDELI IKLHSLGNKWSLIAARLPGRTDNEIKNYWNTH     |
| BnaMYB32-1  | 52  | SCRLRWYNLRLPDLKRCNFTLEEDDLI IKLHSLGNKWSLIAARLPGRTDNEIKNYWNTH     |
| BnaMYB32-2  | 52  | SCRLRWYNLRLPDLKRCNFTLEEDDLI IKLHSLGNKWSLIAARLPGRTDNEIKNYWNTH     |
| BnaMYB7     | 52  | SCRLRWYNLRLPDLKRCNFTREDEDEVI INLHSLGNKWSLIAARLPGRTDNEIKNYWNTH    |
| BnaMYB3     | 52  | SCRLRWYNLRLPDLKRCNFTTEEEDELI IKLHSLGNKWSLIAARLPGRTDNEIKNYWNTH    |
| BnaMYB51    | 53  | SCRLRWANYLRPDIKRGEFTEDEERSI ISLHATHGNKWAIIARLPGRTDNEIKNHNWTH     |
| BnaMYB122   | 52  | SCRLRWANYLRPDIKRGEFSQEEEDSIIRLHATHGNKWSIAIARLPGRTDNEIKNHNWTH     |
| BnaMYB34    | 52  | SCRLRWANYLRPDIKRGEFTPEEDDTI IKLHAKGNKWAIIATCLAGRTDNEIKNYWNTN     |
| BnaMYB16    | 52  | SCRLRWYNLRLPDIKRCKFNLQEEQTI IQLHALLGNRWSAIATHLPKRTDNEIKNYWNTH    |
| BnaMYB106   | 52  | SCRLRWYNLRLPDIKRCKFTVQEEQTI IQLHALLGNRWSAIATHLPKRTDNEIKNYWNTH    |
| BnaMYB47    | 52  | SCRLRWLNYLRPGIKRCKFTPQEEEAIIKLVAVLGNRWAAIAKEMENRTDNDIKNHNWSC     |
| BnaMYB95    | 52  | SCRLRWLNYLRPGIKRCKFTPQEEEDI IKLVAVLGNRWAAIAKQMPNRSDNDIKNHNWSC    |
| BnaMYB41    | 53  | SCRLRWYNLRLPDIKRGRFSFEEETI IQLHSLGNKWSIAIARLPGRTDNEIKNHNWTH      |
| BnaMYB92    | 52  | SCRLRWYNLRLPDIKRCKFSPDEEQTI INLHAVLGNKWSIIANHLPGRTDNEIKNFWNTH    |
| BnaMYB43-1  | 52  | SCRLRWYNLRLPDLKRGLLSECEEQMVIDLHAQLGNRWSKIIASHLPGRTDNEIKNHNWTH    |
| BnaMYB43-2  | 52  | SCRLRWYNLRLPDLKRGLLSECEEQMVIDLHAQLGNRWSKIIASHLPGRTDNEIKNHNWTH    |
| BnaMYB12    | 52  | SCRLRWYNLRSDLKRCNITLEEEELVVKLHSTLGNRWSLIAASHLPGRTDNEIKNYWNTH     |
| BnaMYB111   | 52  | SCRLRWYNLRLPDLKRCNITAEETI IKLHSLGNRWSIIATHLPGRTDNEIKNYWNTH       |
| BnaMYB13    | 52  | SCRLRWYNLRLPDIKRCNFTPQEEETI INLHQLGNRWSIAIAKLPGRTDNEIKNFWNTH     |
| BnaMYB15    | 52  | SCRLRWYNLRLPDIKRCNFTQAEEDAIIISLHQLGNRWSIAIAKLPGRTDNEIKNFWNTH     |
| BnaMYB58    | 54  | SCRLRWYNLRLPDIKRCNFTLEEEETI IKLHQSFGNKWSKIIASKLPGRTDNEIKNFWNTH   |
| BnaMYB123-1 | 55  | SCRLRWKNYLRLPGIKRCNISSDEEELIIRLHNLGNRWSLIAARLPGRTDNEIKNHNWNSN    |
| BnaMYB123-2 | 55  | SCRLRWKNYLRLPGIKRCNISSDEEELIIRLHNLGNRWSLIAARLPGRTDNEIKNHNWNSN    |
| BnaMYB81-1  | 61  | SCRLRWVNLRLPDLKKGSTFDKKEQRVVELHASMGNKWARMMAAQLPGRTDNEIKNFWNTR    |
| BnaMYB81-2  | 61  | SCRLRWVNLRLPDLKKGSTFDKKEQRVVELHASMGNKWARMATELPGRTDNEIKNFWNTR     |
| BnaMYB48    | 48  | SCRLRWVNYLHPGLKRCMTPQEEERLVTELHAKWGNRWSKIIARLPGRTDNEIKNYWRTH     |
| BnaMYB59    | 48  | SCRLRWVNYLHPGLKRCMTHQEEERLVTELHAKWGNRWSKIIARLPGRTDNEIKNYWRTH     |
| BnaMYB62    | 58  | SCRLRWLNYLKPDIRRGNLTPQEQLLIELHLSKGNRWSKIIAQYLPGRTDNEIKNYWRTR     |
| BnaMYB116   | 58  | SCRLRWLNYLKPDIRRGNLTPQEQLLIELHLSKGNRWSKIIAQYLPGRTDNEIKNYWRTR     |
| BnaMYB78-1  | 66  | SCRLRWLNYLRLPDRRCNITLLEEQLLIELHSRWGNRWSKIIAQYLPGRTDNEIKNYWRTR    |
| BnaMYB78-2  | 66  | SCRLRWLNYLRLPDRRCNITLLEEQLLIELHSRWGNRWSKIIAQYLPGRTDNEIKNYWRTR    |
| BnaMYB108-1 | 58  | SCRLRWLNYLRLPDRRCNITLLEEQLLIELHSRWGNRWSKIIAQYLPGRTDNEIKNYWRTR    |
| BnaMYB108-2 | 59  | SCRLRWLNYLRLPDRRCNITLLEEQLLIELHSRWGNRWSKIIAQYLPGRTDNEIKNYWRTR    |
| OsMYB2      | 60  | SCRLRWLNYLRLPDLRRCNITPQEQLLIELHSRWGNRWSKIIAQYLPGRTDNEIKNYWRTR    |
| BnaMYB91-1  | 44  | SCLERWKNYLKPGLKKGSLTEEEQRLVIRLQEKHGKWKKIAAEVPGRTAKRLGKWWEVF      |
| BnaMYB91-2  | 44  | SCLERWKNYLKPGLKKGSLTEEEQRLVIRLQEKHGKWKKIAAEVPGRTAKRLGKWWEVF      |
| BnaMYB88    | 56  | QCRRRWYTYLNSDFKTCGWSPEEDTLICEAQRVFGNRWTEIAKVVSGRTDNAVKNRFTTTL    |
| BnaMYB124   | 60  | QCRRRWYTYLNSDFKTCGWSPEEDTLICEAQRVFGNRWTEIAKVVSGRTDNAVKNRFTTTL    |
| BnaMYB28    | 52  | SCRLRWLNYLKPDIKRGEFSSEEEQIIIMLHASRGNKWSVIARLPGRTDNEIKNYWNTH      |
| ZmC1        | 52  | SCRLRWLNYLRLPDIRRGNISYDEEDLIIRLHRLGNRWSLIAARLPGRTDNEIKNYWNTH     |
| BnaMYB38    | 53  | SCRLRWLNYLRLPDIRRGNISYDEEDLIIRLHRLGNRWSLIAARLPGRTDNEIKNYWNTH     |
| BnaMYB61    | 52  | SCRLRWLNYLRLPDLKRCGAFSPEEENLIVEIHSVLGNRWSQIAARLPGRTDNEIKNHNWNS   |
| BnaMYB46    | 57  | SCRLRWLNYLRLPDLKRCGAFSPEEENLIVEIHSVLGNRWSQIAARLPGRTDNEIKNHNWNS   |
| BnaMYB90    | 48  | SCRLRWLNYLKPDIKRCKLSSDEEVLRLHKLGN-----RLPGRTDNDIKNYWNTH          |
| BnaMYB56    | 117 | SCRLRWLNYLRLPDIRRGNISYDEEDLIIRLHRLGNRWSLIAARLPGRTDNEIKNYWNTH     |
| consensus   | 121 | .*.*.*.*.*.....*.....*.....*.....*.....*.....*.....*.....*.....* |

R2 repeat(continued)

R3 repeat

|             |     |        |                                                         |                                |
|-------------|-----|--------|---------------------------------------------------------|--------------------------------|
| BnaMYB1     | 145 | LRRR   | CTDFETPTN-----                                          | TATGNLVLHDSRLDRMTNTIASSEETLSS  |
| AtMYB1      | 152 | LRRRF  | FIDFEK-AKN-----                                         | IGTGSLVVDDSGFDRIT-TVASSEETLSS  |
| BnaMYB109   | 135 | LRRK   | YADLWKNSNQ-----                                         | VTTAYIKNENVEQQVPQEEIVSPP-----  |
| BnaMYB44    | 103 | LKRK   | CG-GFYASA-----                                          | EDQRPVKRS---VSDGY-----         |
| BnaMYB77    | 103 | LKRK   | CSDGNPTAE-----                                          | EDQDPAKKRRSMSSESV-----         |
| BnaMYB73    | 110 | LKRK   | CSAFTSEGQS-----                                         | CDFGGNGGYDGNLGEEQPLKRTASG----- |
| BnaMYB96-1  | 112 | LKKKL  | KKKINESGEE-----                                         | DNDDFFSSKTIISQK-----           |
| BnaMYB96-2  | 112 | LKKKL  | KKKINESGEE-----                                         | DNDGFTSSHTIISQK-----           |
| BnaMYB30    | 112 | LKKKL  | LNKANQVSHQ-----                                         | EHDQSRDRSSLSS-----             |
| BnaMYB31    | 112 | LKKKL  | NLQRQNGS-----                                           | NDDDTNMTMTEMSSCD-----          |
| AtMYB0_GL1  | 114 | LSKKL  | LVGDYSSAVK-----                                         | TTGEDDD-----                   |
| BnaMYB4-1   | 112 | IRRKL  | INRGIDPT-----                                           | HRPVQESSASQDS-----             |
| BnaMYB4-2   | 112 | IRRKL  | INRGIDPT-----                                           | HRPVQESSASQDS-----             |
| BnaMYB4-3   | 112 | IRRKL  | INRGIDPT-----                                           | HRPIQESS-ASQDS-----            |
| BnaMYB32-1  | 112 | VKRKL  | LRGGIDPAT-----                                          | HRPIKARRDASEAR-----            |
| BnaMYB32-2  | 112 | MKRKL  | LRGGIDPAT-----                                          | HRPIKARRDASEAR-----            |
| BnaMYB7     | 112 | IKRKL  | LSKGIDPNT-----                                          | HRSINAG-KVSDSK-----            |
| BnaMYB3     | 112 | IKRKL  | LSRGIDPNT-----                                          | HRSINGSATPPSKT-----            |
| BnaMYB51    | 113 | IKKRL  | IKKGVDPV-----                                           | HKSLISDKSENLEIPEKQNVIIQTIIT--  |
| BnaMYB122   | 112 | IKKRL  | IKKGIDPL-----                                           | HKSLNGKSSDHPETPPDKSSVHQ-----   |
| BnaMYB34    | 112 | IKKRL  | KQFGIDPT-----                                           | HKPINSTDQGTGSEP-----           |
| BnaMYB16    | 112 | IKKRL  | VKMGIDPVT-----                                          | HKPKNETPLSTLGG-----            |
| BnaMYB106   | 112 | IKKRL  | VKMGIDPVT-----                                          | HKHKNETLMSSTGQ-----            |
| BnaMYB47    | 112 | IKKRL  | SKNGIDPMT-----                                          | HEPIINNLTVTITT-----            |
| BnaMYB95    | 112 | IKKRL  | VRSRIDPMT-----                                          | HKPVVTVAKATSS-----             |
| BnaMYB41    | 113 | IKRKL  | VRSRIDPVT-----                                          | HSPRLDLLD-----                 |
| BnaMYB92    | 112 | LKKKL  | IQMGIDPMT-----                                          | HLPRTDIFSSLSQL-----            |
| BnaMYB43-1  | 112 | IKKRL  | LRKMIDPMT-----                                          | HKPLPEQDGSQQAQ-----            |
| BnaMYB43-2  | 112 | IKKRL  | LRKMIDPMT-----                                          | HKPLPEQDGSQQAQ-----            |
| BnaMYB12    | 112 | LRK    | LHNFIIRK-P-----                                         | SISHNVPDVVINAP-----            |
| BnaMYB111   | 112 | LSRK   | IYAFTTVTGD-----                                         | EHSLKVVDDLVLNKS-----           |
| BnaMYB13    | 112 | LKKRL  | IQ---HNQ-----                                           | DQNISETICDNDEQ-----            |
| BnaMYB15    | 112 | LKKRL  | LE---DNQPA-----                                         | KPKTSNKKKSTKPK-----            |
| BnaMYB58    | 114 | LKKRL  | NSYINHNAS-----                                          | DEAASKGSLNKEET-----            |
| BnaMYB123-1 | 115 | IKRKL  | PKSQTNQK-----                                           | SRKHSNNNNMNKVC-----            |
| BnaMYB123-2 | 115 | IKRKL  | PKSQTNQK-----                                           | SRKHSNNNNMNKVS-----            |
| BnaMYB81-1  | 121 | VKKL   | QRLGLPIYPD-----                                         | EVREQAMNAAAQNGQNSD---HSQESL    |
| BnaMYB81-2  | 121 | VKRL   | QRLGLPIYPD-----                                         | EVREQAMNAAAQNGHNSDLSLGDGHSQESL |
| BnaMYB48    | 108 | MRKKA  | QAEKKRHVSP-----                                         | SSSCSKCCSSSMTTNT-----          |
| BnaMYB59    | 108 | MRKQA  | QAEKKRPMSP-----                                         | TSSSSNCCSSSMTQD-----           |
| BnaMYB62    | 118 | VQKQA  | RQLNIESNS-----                                          | DKFFDAVRSFWVPRLI-----          |
| BnaMYB116   | 118 | VQKQA  | RQLNIDSS-----                                           | HQFLEVRSFWVPRLI-----           |
| BnaMYB78-1  | 126 | VQKHAK | QLRCDVNS-----                                           | QQFKDTMRYLWMPRLV-----          |
| BnaMYB78-2  | 126 | VQKHAK | QLRCDVNS-----                                           | QQFKDTMRYLWMPRLV-----          |
| BnaMYB108-1 | 118 | VQKHAK | QLKCDVNS-----                                           | QQFKDTMKYMWMPRLV-----          |
| BnaMYB108-2 | 119 | VQKHAK | QLKCDVNS-----                                           | QQFKDTMKYMWMPRLV-----          |
| OsMYB2      | 120 | VQKHAK | QLKCDVNS-----                                           | QQFKDVMRYLWMPRLV-----          |
| BnaMYB91-1  | 104 | KEKQ   | QREEKESNKR-----                                         | VEPIDESKYDRILESFAEKLVK-----    |
| BnaMYB91-2  | 104 | KEKO   | OREEKESNKR-----                                         | VEPIDESKYDRILESFAEKLVK-----    |
| BnaMYB88    | 116 | CKKRA  | KYEEAMAKDNTLASCNKRMLLPDCGISTPPKAESVSPLAKKIRRSDIPGPTVFGG |                                |
| BnaMYB124   | 120 | CKKRA  | KHEAMANSN-----NKRMLFLDG-ISTPQKADNEAPISKRTRRSHILELTEMNN  |                                |
| BnaMYB28    | 112 | LKKRL  | IEQDASSD-----                                           | KQYSRSSSMPSMCTPS-----          |
| ZmC1        | 112 | LGRR   | AGAGAGAGGS-----                                         | WVVVAPDTGSHATP-----            |
| BnaMYB38    | 113 | LKKKL  | IATMAPPPP-----                                          | HLLAIASSSSSPS-----             |
| BnaMYB61    | 112 | IKKKL  | RQRGIDPNT-----                                          | HKPISEVDKDKTTATS-----          |
| BnaMYB46    | 117 | IKKRL  | KKMSDTSNLVN-----                                        | NSSSSPDTSDLN-----              |
| BnaMYB90    | 101 | LSKK   | HEPCCCKTKMK-----                                        | -----                          |
| BnaMYB56    | 177 | MA     | RRTRKSQRQRHQ-----                                       | -----                          |
| consensus   | 181 | .....  | .                                                       | -----                          |

### R3 repeat (continued)

|             |     |                                                               |
|-------------|-----|---------------------------------------------------------------|
| BnaMYB1     | 188 | GGG-----GGGGGHITTPLVSSDGKEATS-MEISEEQPSDKANEE                 |
| AtMYB1      | 193 | GG-----GCHVTTPIVSPEGKEATSMEMSEEQCVEKTNGE                      |
| BnaMYB109   | 173 | -----QVVDVPMYDEPTQVLDDVTMDDASPNEPQEQQA                        |
| BnaMYB44    | 129 | -----PPVANGLLMSPGSPGSDVSDSSTLPVLTSVEVF                        |
| BnaMYB77    | 133 | -----PPVDTGLYMSPESPT-DVGSDS SAVPPQR----F                      |
| BnaMYB73    | 149 | -----GGVSTGLYMSPGSPGSDVSEQSCGVPHV----F                        |
| BnaMYB96-1  | 140 | -----QHQSSN-----KGQWERRLQT                                    |
| BnaMYB96-2  | 140 | -----QHHSSN-----KGQWERRLQT                                    |
| BnaMYB30    | 140 | -----PSSSSANSNSNINIARGQWERRLQT                                |
| BnaMYB31    | 140 | -----NNNNTNRRSVN----KGQWEKKLQT                                |
| AtMYB0_GL1  | 135 | -----                                                         |
| BnaMYB4-1   | 140 | -----KPTQLAEAITSNNTINISFTN---TPKMES---T                       |
| BnaMYB4-2   | 140 | -----KPTQLIEAITSNNTINISFTS---TPKMES---T                       |
| BnaMYB4-3   | 139 | -----KPTHL-EAITSN-TINISFASSSSTPKMEIFQES                       |
| BnaMYB32-1  | 140 | -----ETEDSLVKVLSFGPQLEKEES----SREEG----                       |
| BnaMYB32-2  | 140 | -----ETEDSLVKVISFGPQLEKEES----SREEG----                       |
| BnaMYB7     | 139 | -----KTEDQVVKDVSFGYLFDKTEK----SEEQK----                       |
| BnaMYB3     | 140 | -----TTPSLQNDPVRFDVDFSGPDQQ--RTVKPEPMLLD                      |
| BnaMYB51    | 154 | -----SDDDL DNEKVKNNNEK PGLSSAKFLNRVANRFGKRINQSVLSEIIGSGGPLTT  |
| BnaMYB122   | 149 | -----DDDDQKSNKNNALGSL SARFLNRVANRFGKRINQSVLSDIIGSGDPTT        |
| BnaMYB34    | 140 | -----KHKHKL GSSG SARLLNRVASKYSVDSNRDLLTGI I IGNSTNIA          |
| BnaMYB16    | 140 | -----LSKNAATLSHMAQWESARLEAEAR-LARESKLLHY                      |
| BnaMYB106   | 140 | -----SKSAAATLSHMAQWESARLEAEAR-LARESKLLHY                      |
| BnaMYB47    | 140 | -----EEECGSSPTNTSLTTEGHFSSSPGLARLLNKLA                        |
| BnaMYB95    | 140 | -----TTSSPTTPSSSSSSSS--FSSTSS--ARLLNKLA                       |
| BnaMYB41    | 136 | -----LSSLAAIFNQPKFSSVATNASSLLNPDVRLA                          |
| BnaMYB92    | 140 | -----MSLSSNLRGFVDMQQQFPNGQDQITILKLQTEMAKL                     |
| BnaMYB43-1  | 140 | -----GSKSLVPHDDKNNKQDQEDKQTKKEQEHHLGIDL                       |
| BnaMYB43-2  | 140 | -----GSKSLVPHDDKNNKQDQEDKQTKKEQEHHLGIDL                       |
| BnaMYB12    | 139 | -----PRSPR-----PPTKRRPGRTSRSTMKPKTHANI                        |
| BnaMYB111   | 140 | -----SSSLGAKNTNKTKKKKGRFSRSSMKKHKQMVTA                        |
| BnaMYB13    | 135 | -----LVSVM-----DEKRPSPPQQSSSSTNISAV                           |
| BnaMYB15    | 137 | -----SQSVP-----AKSKSTKTESELASSSNPSFE                          |
| BnaMYB58    | 142 | -----SQESS-----PNASRSFGGSNIVSKEEEDDV                          |
| BnaMYB123-1 | 143 | -----VIRPKAIRFPKALTFQNKSSIGST                                 |
| BnaMYB123-2 | 143 | -----VIRPKAIRCPKALTFQKQSSIGST                                 |
| BnaMYB81-1  | 159 | EPDCLEIPEFDKYLQLN--NYQSVLLRNVP MGNMMKHCS--FQPNMYNLIGSPYMSP-   |
| BnaMYB81-2  | 164 | ELDCLEIPELNFKHLQLNGGSSFLQSM LSSVPTGNQMRQNPGLFQPN IYVNIASPYHQP |
| BnaMYB48    | 138 | -----TQDVSE-----SRMSSGKVSFYDTGGNREMNO                         |
| BnaMYB59    | 137 | -----TGGSNKMNQ                                                |
| BnaMYB62    | 148 | -----EKMEQNSSTTYACPQNNNNNNNNSSLLPSPQTFE                       |
| BnaMYB116   | 148 | -----HKMKDYS-----NTNSKAPPTDSLGP                               |
| BnaMYB78-1  | 156 | -----ERIQASA-----STSTGSATTSSCVTTPSDQFLM                       |
| BnaMYB78-2  | 156 | -----ERIQAAS-----ASSTGSAKSCVTTTTDQFVI                         |
| BnaMYB108-1 | 148 | -----ERIQSASASASALISTTGSATTSSCITTSNNEFMT                      |
| BnaMYB108-2 | 149 | -----ERIQSA--AASLTSTTGSATTSSCITTSNNEFMT                       |
| OsMYB2      | 150 | -----ERIQAAAAGQQQ-QQEGGTDTPPLSWQHGGSDGLY                      |
| BnaMYB91-1  | 140 | -----ERSSVPSAVMASSNGGFQQAPPNNNNNNNNNNHVI PP                   |
| BnaMYB91-2  | 140 | -----ERSSVP-AVMASSNGGFQQAPPPN-----NNHVI PP                    |
| BnaMYB88    | 176 | YGDRSHIKVNSGVNQHSSYGDRSHIKVVNQIRPPFWVIAHNEEKIQKDSAKESEGEDKE   |
| BnaMYB124   | 173 | YGN----VEPCLNQA----RSPFVLAHNATG----IDSL EEQYQTSNVKESDGE--     |
| BnaMYB28    | 143 | -----SGFNTVFENTSKDGTVPVREDDSLSRKKRLKKSST                      |
| ZmC1        | 140 | -----AATSGACETGQNSAAHRADPDSA                                  |
| BnaMYB38    | 141 | -----SSHYNMTNSLPPYNPSISTNELLTPHQEMMT                          |
| BnaMYB61    | 142 | -----NNNNHKSPSSSSPTNQDFFLERPSDFSDYFGL                         |
| BnaMYB46    | 147 | -----TTSSLELKDIIGSFMSLQEQGF INI                               |
| BnaMYB90    | 115 | -----KRNVTFSSTTQAQKI                                          |
| BnaMYB56    | 191 | -----PPQAPSGNAEMA VSSSYNHGDEFFG                               |
| consensus   | 241 |                                                               |



BnaMYB1 227 DISRQECNNDPPTLFRPVAKLSSFN-----PYNHMEGSSPTHTLNQNK-  
 AtMYB1 229 GISRQD-DKDPPTLFRPVPRLSSFN-----ACNHMEGSPSPHIQDQNQ-  
 BnaMYB109 205 PIEKSSIPVFRPVARAGAFRVYNPT-----SQRNGYRDHNVPCEGPL-  
 BnaMYB44 163 KPVPRAGGVMLPLPIETSTFCDDPA-----TSLSLSLPGADVSEESNR-  
 BnaMYB77 162 KPMTSSS-----EEDPA-----TTLSSLSL-VPVQSERN-  
 BnaMYB73 179 KPTARSG---AVTEVTASTSGEDPP-----TCLSSLSL-PWNNRCETETV-  
 BnaMYB96-1 156 DINMAKQALSEALSLDKKPPSSSVIIPQNI PSFSSVLLDNCHDPSSSSSSTTTTTTTS-  
 BnaMYB96-2 156 DINMAKQALCEALSLDKKPS-----KFSPSSSSLSIIPQNI PSFSSSSTTTTTITT--  
 BnaMYB30 165 DIHLAKKALSEALSP-----AVAPINTATSSSAESRLTTSSASG-  
 BnaMYB31 161 DINMAKQALFQALS LD-----QASSITPDPDSPK-  
 AtMYB0\_GL1 135 -----SPPSLFITAAP-  
 BnaMYB4-1 168 SCFQVKPEKISMLTFKEEKDE-----FLIEEKLPD LNLELRISLDPD-  
 BnaMYB4-2 168 SCFQVKPEKISMLTFKEEKDE-----FLTEEKLPD LNLELRISLDPD-  
 BnaMYB4-3 171 TSFPGKQEKISMVTFKEEKDE-----CPVEENFPD LNLELRISLDPD-  
 BnaMYB32-1 166 RFKKS-----LTCKTK-----SLD LNLELRISPPW-  
 BnaMYB32-2 166 RFKKS-----LTCKTK-----SLD LNLELRISPPW-  
 BnaMYB7 165 QNKKQKQNLINGLVCKEERVEHHP-----AVVVQEIFCPN LNLELRISPPW-  
 BnaMYB3 172 REETNNNNINNTSSGTTSEK-----DIQTDDDW LNLELRISPPW-  
 BnaMYB51 207 TTTSHATTTSTVTNSESDKSTSS-----SFTPTSDLLCQMTVNGNATSSP-  
 BnaMYB122 198 FTTPTTSASECEKSSSSFSKNSS-----DLLINENMILDATSLSSSTFS--  
 BnaMYB34 182 DISQNTGDVDSPTKNSTLLN-----QMAAASSGFIILTNTSTSPG-  
 BnaMYB16 174 QTKVSSSHHDHLNI ISSDQ-----QKQQQLESPTSTVTFSEAKT  
 BnaMYB106 174 QNNKAAAPNCLSHKASSTNWTKP-----NQKGDQQLSPTSTVTFSEN LH  
 BnaMYB47 175 GIASRQHDLDR IKNILLDR-----  
 BnaMYB95 171 GISSRKHELDRIK NIMSE-----  
 BnaMYB41 169 SLLLPPQQPLQNPNTLYAS-----NLDQNLQTPNTSVSSQDS--  
 BnaMYB92 175 QLFQYLLQPPTMSNNIRNP-----NDFDILSLLNSIASFKEI--  
 BnaMYB43-1 175 DKSNTISTDDGFCIDEVP-----LLDPHEILLDIS----  
 BnaMYB43-2 175 DKSNTISTDDGFCIDEVP-----LLDPHEILLDIS----  
 BnaMYB12 168 RKMKKTSEPPEPEASAAVKAGEETLMMELNGAEALGPCNYVYVTCHEGGNNNNNNNS-  
 BnaMYB111 174 SQCLPQPKELESEISEGWNS-----GNYEGKSLGAYE WL DGEIERL-  
 BnaMYB13 161 TTSSNNNDVSNNNIKDSATS-----PED-----  
 BnaMYB15 163 SLFSASLSASDEVSE TLTS-----HEDHSKEAQMDNKLREMI-  
 BnaMYB58 168 QIGETF EYFQDYSELAGLLQ-----EVDKPELLEIP-----  
 BnaMYB123-1 167 SLLTVKENVIDHQAGSP SLLG-----  
 BnaMYB123-2 167 SLLTVKENVIDQQASSP SLLG-----  
 BnaMYB81-1 213 NRKRVREQETDFLDTGDYATNEQSAQLWNQ-----KQFHVVPESHLLGNATTYSSP--  
 BnaMYB81-2 224 NRKRFREPETA FPYTGGYATDEHSAQLWNSPFVESTPGQFN VAPDSHFLGNATTYSSPSE  
 BnaMYB48 166 EETKDGYSMDDIWKEIDHSAVNI IQ-----PVKDIYL-EQSYCLSYPNL--  
 BnaMYB59 147 ECDDGNYSMDDIWREIDQSGANI IK-----PVKDIYYSEQSCYFNFPPLP-  
 BnaMYB62 183 SMSTQTYQDLSGLSNMDGSSSSS-----AFMPDLMTVPHFMDPN-TI-  
 BnaMYB116 169 VVQDNNF SHNSGLNIDCSTSMSQD-----LAKISQLMDLSDLETTNSMC-  
 BnaMYB78-1 185 TSYDAGLNNNNNTNMDHLSFMSNP-----NGYVTQETSSVSVSPTSGL-  
 BnaMYB78-2 185 TSYDDGANNNN-TSIDHLGLTNNP-----NGYVTS GTSSVTVSPASGL-  
 BnaMYB108-1 183 YDY-----NNNNSIGERLGMNN-----NNYITL ENSSVAVSPVSDL-  
 BnaMYB108-2 181 YDY-----NNN NF IGERLGMNN-----NDYITPENSSVAVSPVSDL-  
 OsMYB2 184 ESPELPAPDASCWPAEYCAAAGGAQ-----SGGTPAPELSSTTAGSSSLS-  
 BnaMYB91-1 179 WLATSNNGNNVVARPPSVTLT LSPSVAATPPQQQPIPWLQQQPEASPGGLV LGSMI PSC  
 BnaMYB91-2 171 WLATSNNGNNVVARPPSVTLT LSPSVAATPPQQ-PIPWLQQQPEASPGGLV LGSMI PSC  
 BnaMYB88 236 MFLKKDDPKVTS LMQQAELLSLAQKVN---TEQSMENAWKVLQDFFNKSKENDIFRYG-  
 BnaMYB124 218 MFLKKDDPKVTALMQQAELLSLAQKVNADNTEQSMENAWKVLQDFLNK GKENDLLRYG-  
 BnaMYB28 178 SRLLNKVAAKATSMKEALSASMEGS-----LNANTSFSNGYSEQILNEDD-  
 ZmC1 163 GTTTTSAAVWAPKAVRCTGG-----LFFFHRD TTPAHAG-  
 BnaMYB38 173 MMDQQQQQLLYQEAVDSL VNS-----PNSNKLIMSHQEDS-  
 BnaMYB61 175 QKLNFN SNLGLSVTADSSPLCSMIP-----SQFSTGNMVGSVFQTP-  
 BnaMYB46 171 PSFTNTPITNNNPFAPHMIS-----  
 BnaMYB90 130 DVFKPRPRLFTVNNGC SHLHG-----LPEVDVVPCLGLNNIN-  
 BnaMYB56 216 TVVNGTFVNEEDEAGDDDG S-----TVSTCTTELSLTPPS-  
 consensus 301

|             |     |                                                           |
|-------------|-----|-----------------------------------------------------------|
| BnaMYB1     | 270 | -----FQCKQDTAMLRLLEGAYSERFVPQKCGSGCCSVS                   |
| AtMYB1      | 271 | -----LQSSKQDAAMLRLLEGAYSERFVPQTCGGGCCSN                   |
| BnaMYB109   | 248 | -----IQAAKPDLAGKFLQSLCGEPNIPSKCGHGCSHP                    |
| BnaMYB44    | 206 | -----SHESTNNNTSRSHNTNTMSLMQFSGGFRGAIEEMG                  |
| BnaMYB77    | 191 | -----TGSSDN-----SLPFRFRQMKINVEERG                         |
| BnaMYB73    | 219 | -----RVNEPTQVNENTVTDGGYTAELFFVRKEEVEEEKG                  |
| BnaMYB96-1  | 215 | -----NTTNIYPSGVYASSAENIARLLQDFMKDTPKPLTL                  |
| BnaMYB96-2  | 208 | -----TTQCLSGVYASSAENIARLLQDFMKDTPKSLTL                    |
| BnaMYB30    | 205 | -----FLRTQETSTTYASSIENIAKLLKGWVKKSPTQNSA                  |
| BnaMYB31    | 191 | -----PHDHHSTAIYASSTDNISKLLQNWTSSTSS--SLMP                 |
| AtMYB0_GL1  | 147 | -----SSCHHQENIYENIAKSFNGVVSASYEDKPKQELA                   |
| BnaMYB4-1   | 209 | -----VVE-----GKSTRER-CFKCSLGMINGMEC                       |
| BnaMYB4-2   | 209 | -----VVE-----GKSTRAR-CFRCSLGMINGMEC                       |
| BnaMYB4-3   | 212 | -----VVDHHHQGFVGEKTTTPRRCFKCSLGTINGMEC                    |
| BnaMYB32-1  | 191 | -----QDQQQ-RDERKLLFGREKYLCSACRFLGNGKEY                    |
| BnaMYB32-2  | 191 | -----QDQHR-RDERKLLFRKEKYLCSACRFLGNGKEC                    |
| BnaMYB7     | 211 | -----HNKNH-DDN----TREKSTTYTTSRLYVQNGMES                   |
| BnaMYB3     | 213 | -----TKSYR-YELTRKANPDLAESTRRWSFELLGAQAE                   |
| BnaMYB51    | 253 | -----STFSEASVNDSLMYCDNEDNLGFSN-FLN-----                   |
| BnaMYB122   | 243 | -----SDTSDPSVYD-HIFDDLEDMTAFSSRFLNDVVSH                   |
| BnaMYB34    | 226 | -----FSDNCSFSDGFTEFFSNEEISGMYTNVDNVGLME                   |
| BnaMYB16    | 213 | EFVGS-----STCLNMIKETENDWISSTIHEFERVEEGLTGLLLG             |
| BnaMYB106   | 221 | LMIMPGENNNESEIQNMTEFALSSSTSSDVKDSQDWMRQINCPAEGIEEGFTSLLLL |
| BnaMYB47    | 194 | -----KITINDQDEEGGLRRDQKIG---EEDDFLIW                      |
| BnaMYB95    | 190 | -----PRQAVEEDKMMIGKEDEEVTGCSMEIDENLIS                     |
| BnaMYB41    | 206 | -----QPQAECTAPTQDETSYFEPIMNARLEVGPSDVLP                   |
| BnaMYB92    | 212 | -----TSNNLDLGSNLQDFNSLPSLKTLSNIGPSSVLPQ                   |
| BnaMYB43-1  | 206 | -----FADHHTSDENAHINISNSTSPSSSSTSSCISS                     |
| BnaMYB43-2  | 206 | -----FAQHHTSDENAHINISNSTSPSSSSTSSCISS                     |
| BnaMYB12    | 227 | -----IDGDKGVSSFDEDIIDLLLDESAPSHVLTSCGGNA                  |
| BnaMYB111   | 215 | -----MSSFVWECASEEAVISMNDDDPDQNKVCESGDNIS                  |
| BnaMYB13    | 184 | -----VLPLIDESFWSEVVS---MDYNI                              |
| BnaMYB15    | 201 | -----TTTDQDSFSFINFGEDIDESFWNETLYSQDEENHT                  |
| BnaMYB58    | 199 | -----FDIDPDVWNFLEGFQQPENSLTPKDHQE                         |
| BnaMYB123-1 | 188 | -----DLKIDFDKIQSEYLFSDLMD                                 |
| BnaMYB123-2 | 188 | -----DLKIDFDKIQSEYLFSDLMD                                 |
| BnaMYB81-1  | 264 | PSEPE-----AEKLELPSFQCFDP---PGDWETQHSNMPAVESDRTL           |
| BnaMYB81-2  | 284 | PLIHG-----AEKLELPSFQCFDTQEEPQDWEAQHSNMPQAIESDNTLV         |
| BnaMYB48    | 209 | -----ASPSWESS-----LDSIWKMEEDKSKMSSFAN                     |
| BnaMYB59    | 192 | -----QASPTWESS-----LESTWNMDAYESKMSSF                      |
| BnaMYB62    | 224 | -----IDGSMCYHE-----DNAQELSGYILGTEEY                       |
| BnaMYB116   | 214 | -----LEGSRGSSN-----QYVNEHRCLHEEYIVTT                      |
| BnaMYB78-1  | 228 | -----TEYHIGSEVEKVEN--NQDQSLVGPQIMSPPENYLD                 |
| BnaMYB78-2  | 227 | -----TEYHIGSEVGIETSFDPDQSLVGPQILLPSQNYLD                  |
| BnaMYB108-1 | 220 | -----TDYYNAPKP-----NPDQNLVGPQMLP--DNYFD                   |
| BnaMYB108-2 | 218 | -----TDYYNAPKP-----NPDQNLVGPQMLP--DNYFD                   |
| OsMYB2      | 229 | -----TDSGAGAPSWPTQADGAEWFTTACDASSATGGVAM                  |
| BnaMYB91-1  | 239 | S-----GSNESVFMSELVECCRELEEGHRAWAEHKKEAAWRL                |
| BnaMYB91-2  | 230 | S-----GSNESVFMSELVECCRELEEGHRAWAEHKKEAAWRL                |
| BnaMYB88    | 292 | -----LPDIDFQLEEFKDLVEDLRSSNEDSQASWRQPDLDHSPASSDYSSGSTTMPH |
| BnaMYB124   | 277 | -----FPDIDFQLEEFKDLIGDLRSSYEDNDPSWRQPDLDHSPASSDYSSGSTILLD |
| BnaMYB28    | 223 | -----SSNASLINTLAEFDPFLQTTTFYPENEMNTTSDLD                  |
| ZmC1        | 198 | -----ETATPMAGGGGGGGGEGAG                                  |
| BnaMYB38    | 208 | -----REQSTNKGIMLLSDVRS                                    |
| BnaMYB61    | 216 | -----VCVKPSVTLAPDNTSNFFDNGGFSWSGPNSSSSSSSLVK              |
| BnaMYB46    | 192 | -----HPCIDDFTPYVDGLYGVNTGLQGLYFPPLEC                      |
| BnaMYB90    | 168 | -----NVCENSMTYCNKAGEKYEYELFS                              |
| BnaMYB56    | 252 | -----STHQLRFFNYDSTLAP                                     |
| consensus   | 361 |                                                           |

BnaMYB1 305 -----QKDSLLGPEFVDYLDPPPTFPSYELAAIATDISSSLAWLRSGLLESSVRTMEEAAGR  
 AtMYB1 306 PDGSFQQESLLGPEFVDYLDSPPTFPSSELAIAIATEIGSLAWLRSGLLESSVRVMEAVGR  
 BnaMYB109 283 AE---PGKSVLGAEFVDYEEPCPVFNQELISIAIDLNNIAWIKSGLDNAIVREAEQNLKM  
 BnaMYB44 241 RSF-----GGNGGEFMAVVQEMIK-----AEVRSYMAEMQRNHSGGGFVGGGFRDNG---  
 BnaMYB77 216 G-----EARRAEFMTVVHEMVK-----AEVRSYMAEMQRNN-GGGFVGGGFYDSG---  
 BnaMYB73 254 IS-----GFGGEFMTVVQEMIR-----TEVRSYMAEDLQRGVGGGGSIGSGGGGGGS  
 BnaMYB96-1 250 TSSS-PISETGPLASAAEEGGEGFEQSFSSFNMSMEETQNLQTETNFHFDQESKPAITMD  
 BnaMYB96-2 241 TSSSSPVSETGPLVSAATEEGGEGFEQSFSSFNMSMEETHNLTQETSFFHFDQESKPVITME  
 BnaMYB30 240 DQMVSPDSEAKEVIKSNVEKDCAGAFQSFSGFDHLKDRD----SAGVSPDHETKPDITG-  
 BnaMYB31 224 NTSSLSNNRSSSTGEGGVLDHQCSLFSNPSESGSVDERLNNIMTETNIFKG-ESKSNVDRE  
 AtMYB0\_GL1 182 QKDVLMTATNDPSHYYG--NNALVWHDDDFELSSLVMMNFASGDVEYCL-----  
 BnaMYB4-1 233 RCGSMRCDVVGSSSGSTGKGGDIS---HGFDLGLATKETTTS-LLGFRSLEMI-----  
 BnaMYB4-2 233 RCGSIRCDVVGSSSGSTGNGGDIS---HGFDLGLATKETTTSLLGFRSLEMI-----  
 BnaMYB4-3 246 RCGMRCDVVGSSKGS-GKGSMS---NGFDLGLAKKETNTC-LGFRSLEMK-----  
 BnaMYB32-1 224 SCENVRCHIDSSSSSYSSSDISS-SVVGFDLGLNTSS-----VLDYTSLEMN-----  
 BnaMYB32-2 224 SCENVRCHIDSSSSSYSSSDISS-SVVGFDLGLNTSS-----VLDYTSLEMN-----  
 BnaMYB7 240 SSDTAKCQTEDSSSISHSSLDISSISSVGYDFLGLNTR-----FMDFRSLEMN-----  
 BnaMYB3 246 VCLCCRIGSHNESCRNCRSDVLT-----TWESKIL-----  
 BnaMYB51 281 -DEDFMMLEESSVDNTEFMKELSRFLEED----VNDDVEVMPVYEHQDNIEDIDNYFA-  
 BnaMYB122 276 DDEDFLMLDESCLEKTSFMRELTRILQDDKIETTMCSDSRVTPISEVDVSSFEGIDNWF-  
 BnaMYB34 260 ELEDILSYDGDVGDIKDSPEVDVTDMDMDFLDSWNKEDD--LDLEKFVSSLDKIGVFFV-  
 BnaMYB16 254 G-GGSLGLSFSADKNETAGESSGGGGGECNDYEDNKNYLESIFSVDPSDSTPMF--  
 BnaMYB106 281 GDSGDRSLSIGKKDEETVAGAVEVNESDY-SYEDNKNYWNSILNLVDSTPDSSTMF--  
 BnaMYB47 222 DD-----GEVRRYMDIDPMEYETTPY-----DSVLYESTQILDYLF--  
 BnaMYB95 222 TTSSYEYLTCDFTPTPTYPGFVAADFDDYSLVEPYDLYR-----SDFYHETSDDQLDLFLL  
 BnaMYB41 241 LS-----ESFDLDSLSTPYYSPPQNNIEAEANSSSLFDFRFPDNFTFDDFMGL  
 BnaMYB92 247 IPEDNHFKFCNERENLPVSPPIWLSDPNTSNQHMLPSLDPSSAVSDDMIRNQYVIEHVNSN  
 BnaMYB43-1 238 VPGEFESKFLDEMDTIDLKWLSSDHSSSDNI IYKDDKFHNNVDTMNLWDINYLSSLELFM  
 BnaMYB43-2 238 VPGEFESKFLDEMDTIDLKWLSSDHSSSDNI IYKDDKFHNNVDTMNLWDINYLSSLELFM  
 BnaMYB12 262 ELNHLGDSEEAKRSEILNQESIDCLQSCPSMESFLNYEHQVNNNAFTDEFIDWDCVWQQ  
 BnaMYB111 250 CCVDLFEEEQKGLGSLHVDQDMNIEKEREESILSSNSNESGDKD-WWVGLCDSSEVGFGI  
 BnaMYB13 204 SGDEEIKIEDWESSLDSNIKGYNHDMESWFDNLLTSNLTGTGENSDIF-----  
 BnaMYB15 236 SNLDEMQQEFQHLRSVGNEMIFDSEMDFWFDVLPVRSRGGEQDLLAGL-----  
 BnaMYB58 227 SEEDEVDKWFKNLESELGLEEDDSQQQQEQNNEAKEDSPSPSLESYEVLINH-----  
 BnaMYB123-1 208 FDGLGCGNVMSLVSSDEVLDGYVSADTSCLGNDLNRPFSTCLQEDCLWDFNC-----  
 BnaMYB123-2 208 FDGLGCGNVMSLVSSDEVLDGYVSADTSCLGNDLNRPFSTCLQEDCLWDFNC-----  
 BnaMYB81-1 305 QS-PLTD----CPS---SGLLESVYVYSSGGEKQATNSTDPDPSPLLLQSSSLFGHIELTPA  
 BnaMYB81-2 328 LSSPLTDPTPSECPSSFCGLLESVYVYSSGGEKQTT-TTDPDSP-LLQSSLLGHIDITPA  
 BnaMYB48 236 DQFPFCFQHSRSPWSSG-----  
 BnaMYB59 220 DQFPLSVLNMVDHHRGL-----  
 BnaMYB62 251 MENS DIS--TECQVAEAY---ENVTQDPMWN-----MDDIWQFRE-----  
 BnaMYB116 241 MGNSDILPLQDCHVGVAYSTYEEDVTQDPMWN-----MDDIWQFEYAPFN--  
 BnaMYB78-1 262 VNGGLLS----EDLTQSYHNWFENDN-GMIPPYSDFSFWNIG-SDED-FWLLLQQQQQLVN  
 BnaMYB78-2 263 DKSGLLNGGLRDMQEQQSYHNLFENIN-GMIPSYSDSFWNIG-SDED-FWLLLQQQQQLLN  
 BnaMYB108-1 247 YS-GLLDEDLTATHEQSNLDWFENID-EVVSSSESSELWNIGESDED-FWFCQQQQQ-FNN  
 BnaMYB108-2 245 YS-GLLDEDLTATHEQSNLHWFENID-EVVSSSESSELWNIGESDED-FWFCQQQQQ-FNN  
 OsMYB2 265 RDTELELAQPPCQGGQTWTTSESSLPLGLTFPDLAADFEIGGFVDVDFWTSMEDDQLWCP  
 BnaMYB91-1 276 RRLELQLESEKTSRQREKTEEIEAKMKALREEQKMAMEKIEGEYREQLVGLRRDAEAKDQ  
 BnaMYB91-2 267 RRLELQLESEKTSRQREKTEEIEAKMKALREEQKMAMEKIEGEYREQLVGLRRDAEAKDQ  
 BnaMYB88 344 SSGDQTQQPMLLP-----DNEQVDLLSTCHEIVP-----MSVEEFPNSPVQVTPFLRS  
 BnaMYB124 329 QSGDKTQPSLPDPPTQTEHKESGEDFLSTCDVLPKNPDENKPISGDEENFSSPIQVTPFLRS  
 BnaMYB28 257 IDQDYFSHFLENFGRDDDHNEEHYMNHNHGHDLMSDVSQEVSSTSVDDQDNTNEGWSNY  
 ZmC1 216 SSDDCSSAASVSLRVGSHDEPCFSGDGDGDMDDVRLASFLSEDEDLRCQTAGQLA--  
 BnaMYB38 228 TTSTVTRVKMEQHDHHEERSMEDYGMEEINHLINSSCTSSSSNSLWFDENKTDDTFMLY  
 BnaMYB61 254 PNHNLEEMKWEYSMNTPFNRRSTLNSQPIYIKSEAEYLADVSNITDPWSQSQENLNTP  
 BnaMYB46 224 QEGDWYKADINSHVAEMKTNAGNVPAESMRVEEYWDLDQLMSTVPSFHFNFKQST---  
 BnaMYB90 189 NLMDGENMWWESLLEESKQKPLVPGGTATKMGATFAFDVEQLWNMLDGETVELD-----  
 BnaMYB56 268 GKAGQCQVRAEVSQKSKLDHQNHHTITVSRKVEVKMKS GHYFFDFLGVGAS-----  
 consensus 421

|             |     |                                                         |
|-------------|-----|---------------------------------------------------------|
| BnaMYB1     | 360 | LRPQGTRGHRDHCLVSEQGKSRTNVLST-----                       |
| AtMYB1      | 366 | LRPQGSRGHRDHYLVSSEQGTNITNVLST-----                      |
| BnaMYB109   | 340 | DQITFNDPRIRFSGMMPRQHFFCARS-----                         |
| BnaMYB44    | 288 | -----MIPMSQVGVGRIE-----                                 |
| BnaMYB77    | 260 | -----ITPKVE-----                                        |
| BnaMYB73    | 302 | CMPQSVNSRRVGFREFIVNQIGIGKME-----                        |
| BnaMYB96-1  | 309 | HDFGLISQG---SLSLLEKWLFDEN-----MVGMSLEGQEAI-----         |
| BnaMYB96-2  | 301 | QDPGLISQG---SLSLFEKWLFDEN-----MVAMSLEGQEAI-----         |
| BnaMYB30    | 295 | ----YSNQS---QWSLFEKWLFDEN-----GQVGDILLDENPNFF-----      |
| BnaMYB31    | 283 | ATNNVTTDDPAGSLSLIEQWLYDDQGLVDQCDDVQEDLIDVSLEGKNNGNNGDLS |
| AtMYB0_GL1  |     | -----                                                   |
| BnaMYB4-1   |     | -----                                                   |
| BnaMYB4-2   |     | -----                                                   |
| BnaMYB4-3   |     | -----                                                   |
| BnaMYB32-1  |     | -----                                                   |
| BnaMYB32-2  |     | -----                                                   |
| BnaMYB7     |     | -----                                                   |
| BnaMYB3     |     | -----                                                   |
| BnaMYB51    |     | -----                                                   |
| BnaMYB122   |     | -----                                                   |
| BnaMYB34    |     | -----                                                   |
| BnaMYB16    |     | -----                                                   |
| BnaMYB106   |     | -----                                                   |
| BnaMYB47    |     | -----                                                   |
| BnaMYB95    | 276 | -----                                                   |
| BnaMYB41    | 290 | L-----                                                  |
| BnaMYB92    | 307 | LTSSSQESGASASAAWPDHLLDDSI-----                          |
| BnaMYB43-1  | 298 | NDHDDGFVSGGCSRMLD-----                                  |
| BnaMYB43-2  | 298 | NDHDDGFVSGGCSRMLD-----                                  |
| BnaMYB12    | 322 | GDDNNIFDEKEGSDSMVSWLLDGEDEATIGKSNCESEPLDHDEENALVAWLLS-  |
| BnaMYB111   | 309 | NDELLGWEFQGLTCTDLDLWDLDFGEIQVDSI-----                   |
| BnaMYB13    |     | -----                                                   |
| BnaMYB15    |     | -----                                                   |
| BnaMYB58    |     | -----                                                   |
| BnaMYB123-1 |     | -----                                                   |
| BnaMYB123-2 |     | -----                                                   |
| BnaMYB81-1  | 356 | FEN-----NTETDMFPFGPTSSSERGTSLESGDWIRQLLGEDRDYTK-----    |
| BnaMYB81-2  | 386 | TANTAGHNSSAETDLVHFGPTFSNERRTSFEGGDWIRQLLGEDRDYTK-----   |
| BnaMYB48    |     | -----                                                   |
| BnaMYB59    |     | -----                                                   |
| BnaMYB62    |     | -----                                                   |
| BnaMYB116   |     | -----                                                   |
| BnaMYB78-1  | 315 | NGSF-----                                               |
| BnaMYB78-2  | 320 | NGSF-----                                               |
| BnaMYB108-1 | 303 | NNDF-----                                               |
| BnaMYB108-2 | 301 | NNDF-----                                               |
| OsMYB2      | 325 | TQAAV-----                                              |
| BnaMYB91-1  | 336 | KLADQWTSKHIRLTKFLEQHIGCRQLLDRP-----                     |
| BnaMYB91-2  | 327 | KLADQWTSKHIRLTKFLEQHIGCRQLLDRP-----                     |
| BnaMYB88    | 392 | LAAGIPSPQFSESERNFVLKTLGVESPCPS-ATNLSQPPPCRVLLDSL-----   |
| BnaMYB124   | 389 | LADGIPSPQFSESERSFLKTLGISSPCPSANPSQPPPCRVLLHSL-----      |
| BnaMYB28    | 317 | LLDHADFIHMDYDSL-----                                    |
| ZmC1        |     | -----                                                   |
| BnaMYB38    | 288 | Y-----                                                  |
| BnaMYB61    | 314 | EDSDVFSKDLQRMAVSFGQSL-----                              |
| BnaMYB46    |     | -----                                                   |
| BnaMYB90    |     | -----                                                   |
| BnaMYB56    |     | -----                                                   |
| consensus   | 481 |                                                         |

Figure S1. Multiple sequence alignment and comparison of R2R3-MYB proteins from canola. Identical amino acids are shaded in black, and similar amino acids are shaded in gray. The amino-terminal R2 and R3 repeats of MYB domains for DNA-binding are shown below the alignment. The conserved repression motif LxLxL in BnaMYB3, -4, -7, -32, -44, -73, -77 and -91 is highlighted in blue. The nuclear localization sequence (NLS) predicted by NucPred (<http://www.sbc.su.se/~maccallr/nucpred/cgi-bin/multi.cgi>) and PredictNLS (<https://www.predictprotein.org/home>) are shown in red boxes. The carboxy-terminal region is highly variable and no conserved motif could be detected.

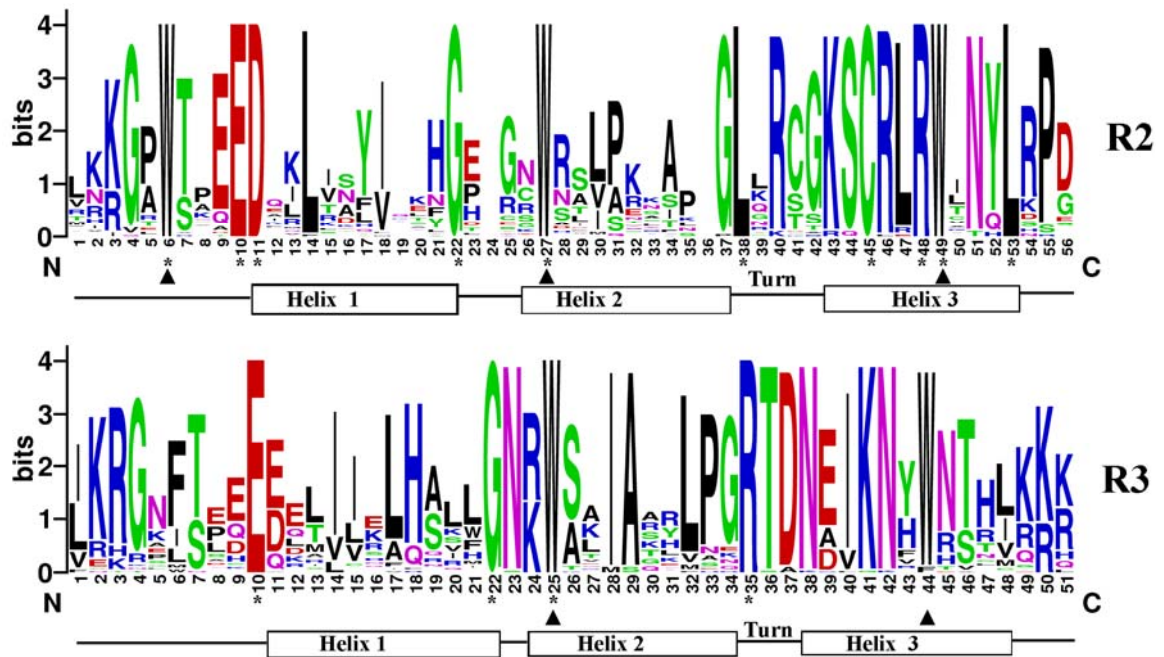

Figure S2. Sequence conservation of the R2R3-MYB domain.

The R2 and R3 MYB repeats are highly conserved across all R2R3-MYB proteins. The sequence logos of the R2 (Top) and R3 (Bottom) MYB repeats are based on full-length alignments of all canola R2R3-MYB proteins. The overall height of each stack indicates the conservation of the sequence at that position, whereas the height of letters within each stack represents the relative frequency of the corresponding amino acid. The asterisks indicate the position of the conserved amino acids that are identical among all the 53 canola R2R3-MYB proteins. Arrowheads show the typical, conserved tryptophan (W) residues in the MYB domain. The positions of the three  $\alpha$ -helices that form each of the two MYB repeat are marked as Helix 1 to Helix 3. The sequence logos were generated by Weblogo (<http://weblogo.berkeley.edu/>).

**A**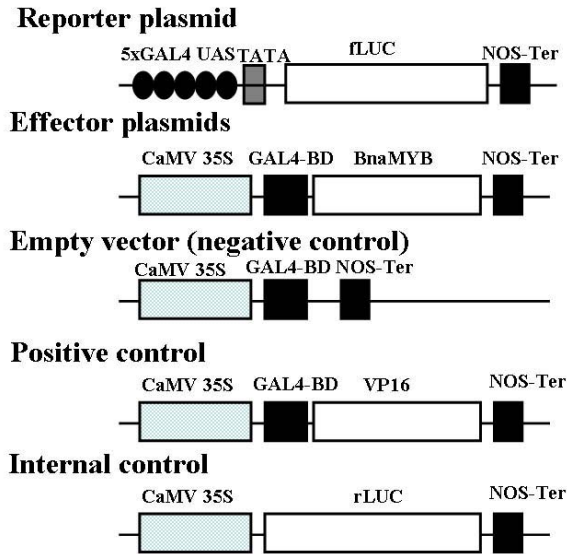**B**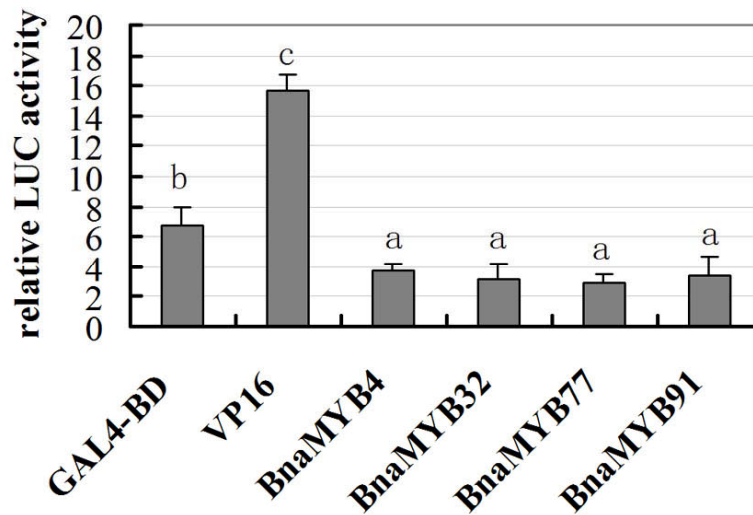**C**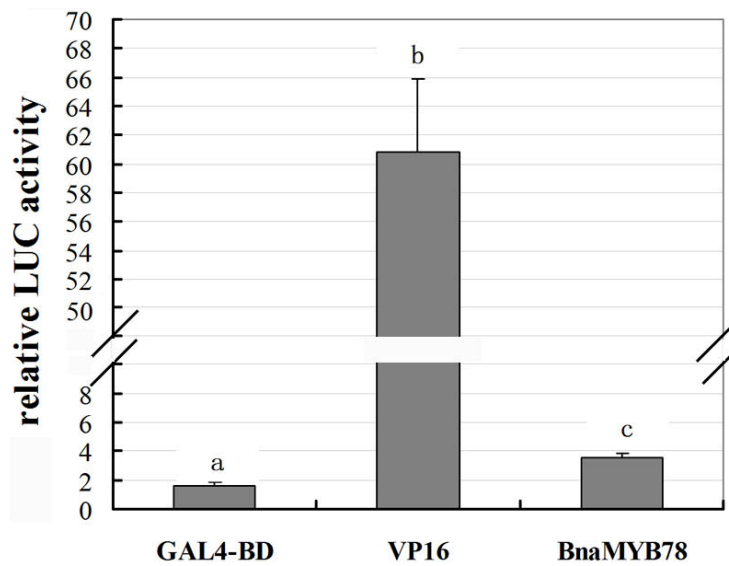

Figure S3. Transcriptional regulation activity of BnaMYBs in protoplast assay.

(A) Schematic representation of constructs used in Arabidopsis protoplast transient

expression assay. The reporter plasmid contains five copies of the GAL4 responsive element, minimal TATA box region (starting at position -46) of CaMV 35S promoter, the firefly luciferase (fLUC) gene, and a nopaline synthase (NOS) terminator. Each of the effectors contains a GAL4 DNA-binding domain (GAL4-BD). The vector GAL4-BD was also used as a negative control. The GAL4-BD fused with viral protein VP16 was used as a positive control. All the effector constructs or internal control were driven by CaMV 35S promoter and ended by NOS terminator sequence.

(B) Effects of the BnaMYBs on reporter gene expression as revealed by relative LUC activity. The GAL4-BD and VP16 were used as negative and positive controls respectively. Identical and different letters indicate non- and significant differences.

(C) Effect of the BnaMYB78 on reporter gene expression as revealed by relative LUC activity. The GAL4-BD and VP16 were used as negative and positive controls respectively. Identical and different letters indicate non- and significant differences.



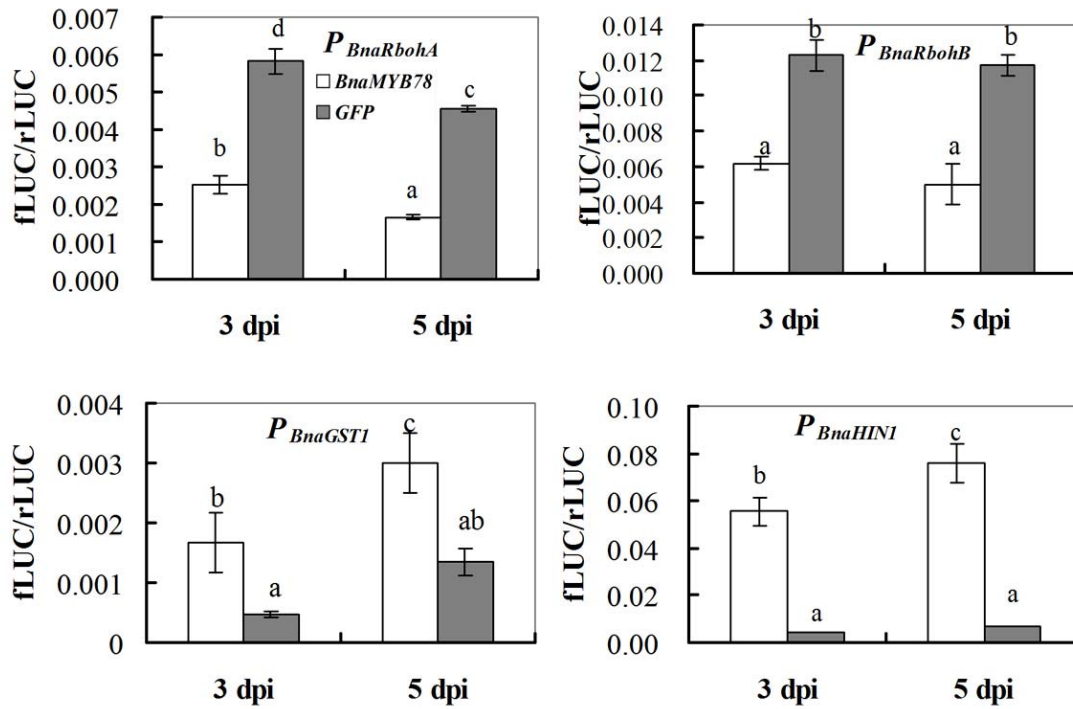

**Figure S4. Dual LUC assay of downstream genes of BnaMYB78.**

Promoter regions of genes were cloned and fused to upstream of firefly luciferase (fLUC) in the pGreenII0800-LUC vector, in which renilla luciferase (rLUC) under the control of the 35S promoter was used as the endogenous control. The effector plasmid is pYJHA-BnaMYB78 and the control plasmid is pYJGFP. Agrobacterial suspensions harboring the respective plasmids were coinfiltrated into *N.benthamiana* leaves, with enzymatic activity assayed 3 and 5 days post-infiltration (dpi). The ability of BnaMYB78 transcription factor to activate the reporter *fLUC* gene was indicated by the ratio of fLUC to rLUC. Error bars indicate the S.E. of three biological replicates. Identical and different letters represent non- and significant differences.

## **Supplemental methods:**

### **1. Protoplast transactivation assay in Arabidopsis**

The coding regions of BnaMYB genes were amplified by high-fidelity PCR with primers included in Table S2. The PCR products were digested and then cloned into pRT107-BD plasmid <sup>1</sup> to yield 35S::GAL4BD-BnaMYBs. Reporter plasmid GAL4UAS::LUC contains five copies of GAL4 binding element and minimal TATA region of 35S promoter of cauliflower mosaic virus (CaMV), which are located upstream of the firefly luciferase (fLUC) gene. Internal control pPTRL contains *Renilla* Luciferase (rLUC) driven by 35S promoter was described previously <sup>2</sup>. All plasmids were isolated and purified through an Endofree Plasmid Maxi Kit (CWBiotech, Beijing).

The isolation and transfection of Arabidopsis mesophyll protoplast were based on the protocol described previously <sup>3</sup>. For co-transfection assays, 6 µg of fLUC reporter and 6 µg of effector plasmids were used for each PEG transfection. For normalization values, 1 µg of pPTRL plasmid were used as internal control. After cultured for 16 h, luciferase activities were examined with using a dual-LUC reporter assay system (Promega, E1910) on a GloMax<sup>TM</sup>20-20 luminometer. Each transfection was repeated three times.

### **2. Quantification of hydrogen peroxide in leaf tissues**

Hydrogen peroxide was extracted and determined according to <sup>4,5</sup> with modifications. Briefly, 0.1 g leaf discs was ground in liquid nitrogen and extracted with 5 ml of 5% (w/v) trichloroacetic acid (TCA), followed by extraction in chloroform and isoamylol (24:1, v/v) and then centrifuged at 16 000 g for 10 min. The supernatant was neutralized to pH 7.5 with 1 M ammonium hydroxide (NH<sub>4</sub>OH), and then the supernatant was divided into two aliquots of 100 µl. 0.4 ml of 100 mM Tris-HCl (pH 8.5) was added into both aliquots. Afterwards, 25 units of catalase (CAT, EC 1.11.1.6, Sigma) was added to one aliquot (blank) and equal amount of ddH<sub>2</sub>O was added to the other aliquot and then kept at room temperature for 30 min. Finally, 0.5 ml colorimetric reagent (0.3 mM potassium titanium oxalate and 0.3 mM 4-(2-pyridylazo) resorcinol monosodium salt, freshly made and mixed at 1:1, v/v) was added and kept

at room temperature for 10 min. Then the absorbance at 508 nm was monitored and concentration of H<sub>2</sub>O<sub>2</sub> was calculated against a standard curve of H<sub>2</sub>O<sub>2</sub> (Alfa Aesar, France).

**References:**

1. Wei, W. et al. Soybean GmPHD-type transcription regulators improve stress tolerance in transgenic Arabidopsis plants. *PLoS One* 4, e7209 (2009).
2. Ohta, M., Ohme-Takagi, M. & Shinshi, H. Three ethylene-responsive transcription factors in tobacco with distinct transactivation functions. *Plant J* 22, 29-38 (2000).
3. Yoo, S. D., Cho, Y. H. & Sheen, J. Arabidopsis mesophyll protoplasts: a versatile cell system for transient gene expression analysis. *Nat Protoc* 2, 1565-72 (2007).
4. Chen, C., Li, H., Zhang, D., Li, P. & Ma, F. The role of anthocyanin in photoprotection and its relationship with the xanthophyll cycle and the antioxidant system in apple peel depends on the light conditions. *Physiol Plant* 149, 354-66 (2013).
5. Patterson, B. D., MacRae, E. A. & Ferguson, I. B. Estimation of hydrogen peroxide in plant extracts using titanium(IV). *Anal Biochem* 139, 487-92 (1984).
